# Supplementary material for: A covalent fragment-based strategy targeting a novel cysteine to inhibit activity of mutant EGFR kinase
Source: Royal Society of Chemistry journal article supplement (doi:10.1039/d3md00439b), 2023-01-01
Supplement: d3md00439b1.pdf [file d3md00439b1.pdf]

Supplementary Information for

**Title:**

A covalent fragment-based strategy targeting a novel cysteine to inhibit activity of mutant EGFR kinase

**Author List:**

*Naoki Kuki,<sup>1</sup> David L. Walmsley,<sup>3</sup> Kazuo Kanai,<sup>1</sup> Sho Takechi,<sup>1</sup> Masao Yoshida,<sup>1</sup> Ryo Murakami,<sup>1</sup> Kohei Takano,<sup>1</sup> Yuichi Tominaga,<sup>1</sup> Mizuki Takahashi,<sup>2</sup> Shuichiro Ito,<sup>2</sup> Naoki Nakao,<sup>2</sup> Hayley Angove,<sup>3</sup> Lisa M. Baker,<sup>3</sup> Edward Carter,<sup>3</sup> Pawel Dokurno,<sup>3</sup> Loic Le Strat,<sup>3</sup> Alba T. Macias,<sup>3</sup> Carrie-Anne Molyneaux,<sup>3</sup> James B. Murray,<sup>3</sup> Allan E. Surgenor,<sup>3</sup> Tomoaki Hamada,<sup>1</sup> Roderick E. Hubbard<sup>3</sup>*

<sup>1</sup> R&D Division Daiichi Sankyo Co., Ltd., Shinagawa-ku, Tokyo 140-8710, Japan

<sup>2</sup> Daiichi Sankyo RD Novare Co., Ltd., Edogawa-ku, Tokyo 134-8630, Japan

<sup>3</sup> Vernalis (R&D) Ltd, Granta Park, Cambridge, UK, CB21 6GB

## Table of Contents

|                                                                                                                           |    |
|---------------------------------------------------------------------------------------------------------------------------|----|
| Experimental Procedures .....                                                                                             | 4  |
| Protein expression and production.....                                                                                    | 4  |
| Fragment screen using the DiscoverX kinomescan platform .....                                                             | 6  |
| Functional assay .....                                                                                                    | 7  |
| Pre-incubation assay .....                                                                                                | 8  |
| Kinase panel .....                                                                                                        | 8  |
| Computational methods .....                                                                                               | 9  |
| Crystallisation and structure determination .....                                                                         | 10 |
| MS and LC-MS methods .....                                                                                                | 11 |
| Chemical synthesis .....                                                                                                  | 12 |
| General .....                                                                                                             | 12 |
| N-(2-methoxy-3-pyridyl)prop-2-enamide ( <b>S-1</b> ) .....                                                                | 12 |
| N-(2-oxo-1H-pyridin-3-yl)prop-2-enamide ( <b>2</b> ) .....                                                                | 12 |
| N-(3-acetylphenyl)prop-2-enamide ( <b>3</b> ).....                                                                        | 13 |
| N-(6-acetamido-2-pyridyl)prop-2-enamide ( <b>5</b> ) .....                                                                | 13 |
| N-(1-methylbenzimidazol-4-yl)prop-2-enamide ( <b>7</b> ).....                                                             | 13 |
| N-(7-quinolyl)prop-2-enamide ( <b>8</b> ).....                                                                            | 14 |
| N-[7-(dimethylamino)-2-methyl-pyrazolo[1,5-a]pyrimidin-5-yl]prop-2-enamide ( <b>9</b> ) .....                             | 14 |
| N-pyrazolo[1,5-a]pyridin-2-ylprop-2-enamide ( <b>10</b> ) .....                                                           | 14 |
| N-(2,3-dimethylindazol-6-yl)prop-2-enamide ( <b>11</b> ) .....                                                            | 15 |
| N-(4-phenylpyridin-2-yl)prop-2-enamide ( <b>12</b> ).....                                                                 | 15 |
| 4-(1-methylindol-3-yl)pyridin-2-amine ( <b>S-2</b> ).....                                                                 | 15 |
| N-[4-(1-methylindol-3-yl)-2-pyridyl]prop-2-enamide ( <b>13</b> ).....                                                     | 16 |
| 6-(1-methylindol-3-yl)pyrimidin-4-amine ( <b>S-3</b> ).....                                                               | 16 |
| N-[6-(1-methylindol-3-yl)pyrimidin-4-yl]prop-2-enamide ( <b>14</b> ).....                                                 | 16 |
| Supplementary Figures .....                                                                                               | 25 |
| Figure S1: overlay of ATP binding pocket in the structures of EGFR, TTBK1 and MELK kinases                                | 25 |
| Figure S2: Comparison of the structure of <b>4</b> bound to EGFR_wtX, EGFR_DMx and EGFR_TMx                               | 26 |
| Figure S3. Comparison of the predicted binding pose of acrylamide compounds with that observed in crystal structures..... | 27 |
| Figure S4: MS of EGFR_SM2 and EGFR_DM2 incubated with compound <b>14</b> .....                                            | 28 |
| Figure S5: Inhibition of a panel of 68 kinases by compound <b>14</b> .....                                                | 29 |
| Supplementary Tables .....                                                                                                | 30 |
| Table S1 Data collection details .....                                                                                    | 30 |

|                                                                                                              |    |
|--------------------------------------------------------------------------------------------------------------|----|
| Table S2: Procurement of tested kinases. ....                                                                | 31 |
| Table S3: Sequences of Substrate Peptides. ....                                                              | 33 |
| Table S4: Assay conditions for tested kinases. ....                                                          | 34 |
| Table S5 Mass spectrometry of EGFR_TMXX and EGFR_DMXX incubated with acrylamide<br>fragments at pH 7.4 ..... | 36 |
| Table S6: Summary of refinement of X-ray crystallographic data .....                                         | 37 |
| References .....                                                                                             | 38 |

## Experimental Procedures

### Protein expression and production

DNAs encoding the kinase domain of human EGFR (Uniprot ID: P00533) were ordered from GeneArt (Thermo Fisher Scientific) codon optimised for *Spodoptera frugiperda*. Wild type EGFR (EGFR\_wt), residues 694-1022 were encoded with an N-terminal twin Strep-tag followed by a TEV cleavage site leaving a Glycine-Serine scar. The mutants EGFR\_wtX, EGFR\_SM, EGFR\_DM, EGFR\_DMx, EGFR\_TM and EGFR\_TMX (see below) were encoded with either an N-terminal 6His or a twin 6His-tag followed by TEV cleavage site leaving a Glycine scar. The mutant EGFR constructs used for crystallography (EGFR\_wtX, EGFR\_DMx, EGFR\_TMX) also contained a C-terminal Asparagine-Serine scar. The sequences were cloned into pFastBac1 and baculovirus prepared using standard techniques. Proteins were expressed in Sf9 cells at 27°C with shaking for 72 hours, harvested by centrifugation at 6,000xg for 30 mins and the cell pellet frozen at -80°C until used.

All steps were performed at 4°C. Cell pellets were thawed and resuspended in lysis buffer (buffer A supplemented with DNaseI and Protease Inhibitor cocktail) and lysed by Frech pressure cell press homogenisation. The lysate was centrifuged at 40,000xg for 1 hour and the supernatant applied to affinity chromatography columns connected to an AKTA Pure pre-equilibrated in buffer A. For constructs containing a twin Strep-tag a 5 mL Streptactin XT Superflow column was used (IBA Lifesciences). Sample was loaded onto the column at 1 mL/min and all remaining steps were performed at 5 mL/min. After sample loading the column was washed to UV baseline with buffer A (100 mM HEPES[pH 8.0], 500 mM NaCl, 10% glycerol, 2 mM TCEP) followed by a step elution to 100% buffer B (buffer A + 50 mM biotin). For constructs containing a His-tag a 5 ml HiTrap TALON crude column (Cytiva) was used. Sample was loaded onto the column at 1 mL/min and all remaining steps were performed at 5 mL/min. After sample loading the column was washed to UV baseline with buffer A (50 mM HEPES [pH 8.0], 300 mM NaCl, 10% glycerol, 1 mM TCEP) before a series of step elutions, 5%, 10% and 100% buffer B (buffer A + 400 mM imidazole). Affinity purified proteins were TEV cleaved overnight during dialysis, followed by removal of protease by negative IMAC. Proteins were subsequently purified by size exclusion chromatography using a HiLoad 26/600 Superdex 200 column. Final buffer for EGFR\_wt was 25 mM HEPES [pH 8.0], 150 mM NaCl, 2 mM TCEP. Final buffer for EGFR mutants was 25 mM Tris [pH 8.0], 100 mM NaCl, 2 mM TCEP. The fractions containing the target protein were pooled, frozen in liquid nitrogen and stored at -80°C until used.

To obtain EGFR\_SM2 and EGFR\_DM2 (see below) for LC-MS analysis, N-terminal His-GST tagged EGFR (694-1022, L858R) and His-GST tagged EGFR (694-1022, L858R, C775S) were expressed in Sf9 insect cells using pFB vector. They were purified by Ni affinity chromatography followed by Size exclusion chromatography (SEC) and were concentrated to 0.8 mg/mL in buffer containing 20 mM Tris-HCl (pH 7.5), 150 mM NaCl, 1 mM TCEP, and 5%(v/v) glycerol.

| Name    | Mutations                 | Name     | Mutations                                     | Name     | Mutations       |
|---------|---------------------------|----------|-----------------------------------------------|----------|-----------------|
| EGFR_wt | None                      | EGFR_wtX | E865A,<br>E866A,<br>K867A                     |          |                 |
| EGFR_SM | T790M                     | EGFR_SM2 | L858R                                         |          |                 |
| EGFR_DM | T790M,<br>L858R           | EGFR_DMx | T790M,<br>L858R,<br>E865A,<br>E866A,<br>K867A | EGFR_DM2 | L858R,<br>C775S |
| EGFR_TM | T790M,<br>L858R,<br>C797S | EGFR_TMX | T790M,<br>L858R,<br>C797S,<br>E865A,          |          |                 |

|  |  |  |                 |  |  |
|--|--|--|-----------------|--|--|
|  |  |  | E866A,<br>K867A |  |  |
|--|--|--|-----------------|--|--|

## Fragment screen using the DiscoverX kinomescan platform

In brief, the kinomescan assay detects displacement of DNA tagged kinase from binding to a bead-immobilised ligand, measured by a quantitative qPCR method.<sup>1</sup> The 1350-member Vernalis fragment library was screened for binding to EGFR\_wt and EGFR\_DMx at 200 (81 hits) and 20 (71 hits)  $\mu$ M concentration where a hit is defined as a signal at 1.5 standard deviation from the plate mean after B-score normalization.<sup>2,3</sup> 20 hits bound at both concentrations, of which 6 also bound to EGFR\_wt. In addition, 25 additional compounds were chosen by visual inspection of the assay data, giving a total of 157 overall fragment hits. 56 of the fragment hits (classified into 9 chemotypes) inhibited EGFR\_TM in the Lance assay with a ligand efficiency of greater 0.39; crystal structures were determined of most of the 56 fragment hits, however, only the fragment **1** which formed a covalent bond to C775 was judged suitable for optimisation to give the desired selectivity for EGFR\_TM.

## Functional assay

EGFR kinase activity is measured using a LANCE Ultra kinase activity assay available from Perkin Elmer. The assay is a homogeneous time resolved-fluorescence resonance energy transfer (TR-FRET) assay that measures phosphorylation of a Ulight-labelled JAK1 substrate peptide (Peptide sequence: CAGAGAIETDKEYYTVKD), the product of EGFR kinase activity. The phosphorylated peptide is recognized by a generic Eu-W1024-labelled anti-phosphotyrosine PT66 antibody and, subsequently, the phosphorylated peptide can be quantified by the extent of TR-FRET between the europium donor and Ulight acceptor.

The EGFR wild-type kinase used in this assay was obtained from Carna Biosciences and comprises residue 669 to 1210 of the full length human wild-type EGFR, expressed as a N-terminal GST-fusion protein. EGFR\_DM and EGFR\_TM were prepared as described above.

The kinase reactions are performed in a 10  $\mu$ L volume in 384-well plates (Corning #4513). The kinase reaction was initiated by the addition of EGFR at final concentration of 0.5 nM EGFR\_wt, 0.5 nM EGFR\_DM, or 0.25 nM EGFR\_TM. Final assay conditions were 1  $\mu$ M ATP (EGFR\_wt and EGFR\_TM) or 10  $\mu$ M ATP (EGFR\_DM), 50 nM Ulight-JAK1 peptide, 50 mM Hepes pH 7.5, 10 mM MgCl<sub>2</sub>, 5 mM MnCl<sub>2</sub>, 1 mM DTT, 0.015 % Brij35, 5 % DMSO. The reaction mixture was incubated for 1.5 hours at 23°C, after which the reaction was terminated by addition of 25 mM EDTA in 1x LANCE buffer (Perkin Elmer). Product was then detected after the addition of 1 nM terbium-labelled anti-phosphotyrosine PT66 antibody in 1x LANCE buffer (final volume 15  $\mu$ l). The mixture was further incubated for 1 hour at 23°C.

TR-FRET measurements were performed on a Biotek Synergy Neo plate reader. TR-FRET was measured by excitation of the Europium-donor at 330 nm and subsequent (delay time 100  $\mu$ s) measurement of europium and Ulight emission at 620 nm and 665 nm, respectively, over a collection time of 200  $\mu$ s. The TR-FRET signal was calculated as the emission-ratio at 665 nm over 620 nm.

The TR-FRET ratio readout for test compounds was normalized against 0% inhibition controls wells and 100% inhibition (no protein) control wells. Test compound potency (IC<sub>50</sub>) was estimated by nonlinear regression using the sigmoidal dose-response (variable slope) using Xlfit 4 (IDBS, Guildford, Surrey, UK, model 205). Where the IC<sub>50</sub> could not be determined the % inhibition at the highest tested concentration is given.

$$y = (A + ((B - A) / (1 + ((C/x)^D))))$$

where y is the normalized TR-FRET ratio measurement for a given concentration of test compound, x is the concentration of test compound, A is the estimated efficacy (% inhibition) at infinite compound dilution, and B is the maximal efficacy (% inhibition). C is the IC<sub>50</sub> value and D is the Hill slope coefficient.

## Pre-incubation assay

DMSO solutions of tested compounds were pre-incubated with 250 pg/ $\mu$ L EGFR\_TM (residues 694-1022) in reaction buffer (20 mM HEPES (pH7.4), 5 mM MgCl<sub>2</sub>, 1 mM MnCl<sub>2</sub>, 0.003% Brij-35, 0.004% Tween-20, 2 mM DTT) for specific pre-incubation times (0, 20, 60 minutes, respectively). After pre-incubation, Srcide (PEPTIDE-INST) solution was added at the final concentration of 1.5  $\mu$ M. Simultaneously, ATP (SIGMA-ALDRICH) solution was added at the specific final concentrations (1 mM for “ATP 1 mM” condition, or 5  $\mu$ M for “ATP Km” condition). After incubation at 28°C for 45 minutes (ATP 1 mM condition) or 90 minutes (ATP Km condition), reaction was stopped with stop solution (100 mM HEPES (pH7.4), 0.015% Brij-35, 40 mM EDTA, 0.1% Coating Reagent). EGFR phosphorylation was measured with LabChip EZ Reader II (PerkinElmer, Inc.) at 488 nm excitation and 530 nm emission.

## Kinase panel

Kinase selectivity was evaluated by an accustomed panel of pre-incubation assay. Briefly, DMSO solutions of tested compounds (1  $\mu$ M in final assay reagent) were pre-incubated with the specific concentration of each kinase in reaction buffer (as described in pre-incubation assay section for mutant EGFR proteins, and 100 mM HEPES (pH7.4), 0.003% Brij-35, 0.004% Tween-20, 1 mM DTT for other kinases) for 15 minutes. Substrate solution containing ATP and Substrate Peptide (at the final concentration of 1 mM and 1.5  $\mu$ M, respectively) was added with specific additives for some kinases (in detail, see Table S3 and S4). After incubation for 45 minutes, reaction was stopped and substrate phosphorylation was measured as described in pre-incubation assay section.



## Computational methods

Software used for modelling was from Schrödinger, LLC, New York, NY, 2021; (versions 2018-U1, 2018-U4, 2019-U2), using default settings unless otherwise specified.

The Protein Preparation Wizard protocol was used to prepare the X-ray crystallography structure of **1** bound to EGFR\_DM<sub>X</sub> for covalent docking.<sup>4</sup> Sidechains and hydrogens were added, and protonation states and water networks optimized using default settings. Only the hydrogens were energy minimized to RMSD of 0.3 Å. Waters and ligand **1** were then removed, and the hydrogen added to Cys775 and the structure further minimized. Ligands were transformed from 2D SD files to 3D with Ligprep using default settings, except the ionization pH range was changed to 7±0. The ‘Covalent Docking’ protocol was used for docking the ligands to Cys775.<sup>5,6</sup> Depending on the ligands, the appropriate reaction chemistry was chosen. Some reactions required ‘custom files’ of the type .cdock which for version 2018-U1 could be obtained from <https://www.schrodinger.com/kb/1848> Most of the work involved Michael Additions with acrylamides. The center for the grid was chosen such that the center of similar sized molecules would have to be near the kinase hinge and was kept the same for all covalent docking. No constraints/restraints were specified. The Pose Prediction ‘Thorough’ algorithm used.

## Crystallisation and structure determination

EGFR\_wtX was concentrated to ~15 mg/ml and set up for crystallisation in vapour diffusion sitting drops, against commercial crystallisation screens. Initial crystals were obtained overnight in several conditions, of which best appeared in 0.1M Tris buffer pH 7.0 and 0.8 M Sodium citrate at 292K. Initial crystals diffracted only to 3.8-4.0 Å. Subsequently crystallisation conditions were optimised with the final crystallisation conditions were 0.1 M Tris pH 8.5, 0.15 M sodium citrate 25% Peg400.

Crystals of EGFR\_DMx and EGFR\_TMx were obtained in the same conditions as crystals of EGFR\_wtX. The conditions used for compound soaking and cryoprotection have been the same across all EGFR variants.

For compound soaking, the best-looking single crystals of colourless trapezoid appearance were transferred to solution containing crystallisation solution with 2 mM compound solution in DMSO. Crystals were soaked for 48 hrs, except **1** and **14**, which were soaked overnight. Crystals were subsequently harvested, streaked through cryoprotection solution (crystallisation solution with added 20% glycerol) and flash frozen in a liquid nitrogen. Such prepared crystals were used for data collection at in-house equipment (Bruker D8 Venture TXS Generator coupled with Bruker Photon 100 CMOS detector) or Rigaku MicroMax-007 with HyPix6000 detector) or at the Diamond (beamlines i04-1 and i24) and Soleil (beamlines PX1 and PX2) synchrotrons – details in Table S1.

Diffraction data were indexed and integrated using XDS or the Bruker software SAINT and SADABS (Version 8.37A (2015), Bruker AXS Inc., Madison, Wisconsin, USA), scaled and truncated using SCALA or XSCALE and the CCP4 suite of programs.<sup>7,8</sup> The structures were solved by molecular replacement with MolRep with 5EDQ structure used as a starting model.<sup>9</sup> All structures were refined using Refmac and model building was done with Coot.<sup>10,11</sup> Topology files for the compounds were created by AceDrg.<sup>12</sup> Refinement statistics are reported Table S6.

### MS and LC-MS methods

Compound **14** (0.3  $\mu$ M, 1  $\mu$ M, 3  $\mu$ M) and EGFR\_SM2 or EGFR\_DM2 (0.5 mg/ml) were incubated in buffer containing 20 mM Tris-HCl (pH 7.5), 150 mM NaCl, 1 mM TCEP, and 5% (v/v) glycerol for 1 hour at room temperature followed by an addition of SDS (final 1%) and boiling at 95°C for 10 min. Before the LC-MS analysis, SDS was removed using SDS-eliminant (ATTO #AE-1390). LC-MS analysis was performed on an Ultimate 3000 UHPLC system (Thermo Fisher Scientific) coupled with a Q-Exactive mass spectrometer (Thermo Fisher Scientific). EGFR proteins were separated on a PLRP-S 1000A column (8  $\mu$ m, 50 x 2.1 mm, Agilent) at a flow rate of 0.6 mL/min. The mobile phase consisted of solution A (H<sub>2</sub>O (0.02% TFA, 0.1% HCO<sub>2</sub>H)) and solution B (CH<sub>3</sub>CN). The UHPLC separation was used a linear gradient program of 20–70% B for 7 min and 70% B for 7.5 min. The column temperature was 60°C. The Q-Exactive MS was operated in the positive ion electrospray mode.

## Chemical synthesis

### General

Proton nuclear magnetic resonance spectra ( $^1\text{H-NMR}$ ) were recorded on a JEOL JNM-ECS400 spectrometer or an AVANCE III HD 400 (400 MHz for  $^1\text{H}$ , BRUKER) in the indicated solvent. Chemical shifts ( $\delta$ ) are reported in parts per million relative to the internal standard tetramethylsilane. Abbreviations of multiplicity are as follows: s: singlet, d: doublet, dd: double doublet, t: triplet, q: quartet, m: multiplet, and br: broad. Data are presented as follows: chemical shift (multiplicity, integration, coupling constant). APCI/ESI mass spectra were recorded on Agilent Technologies Agilent 1100 or 1200 series LC/MS. HRMS was carried out by using a liquid chromatography-mass spectrometry (LC-MS) system composed of a Waters Xevo Quadrupole Time-of-Flight Mass Spectrometer and an Acquity UHPLC system. Compound purity was confirmed to exceed 95% by the DAD signal area (%), which was calculated with an Agilent Infinity 1260 LC-MS system. The conditions used were: column, Develosil Combi-RP-5 2.0 mmID  $\times$  50 mmL; gradient elution, 0.1%  $\text{HCO}_2\text{H-H}_2\text{O}$ /0.1%  $\text{HCO}_2\text{H-MeCN}$  = 98/2 to 0/100 (v/v); flow rate, 1.2 mL/min; UV detection, 254 nm; column temperature, 40°C; ionization, APCI/ESI. Purity  $\geq 95\%$  was determined by elemental analysis for each of the tested compounds. Flash column chromatography was performed using Purif-Pack® SI 30  $\mu\text{m}$  and Purif-Pack® NH 30  $\mu\text{m}$  supplied by Shoko Scientific or Merck silica gel 60 (230–400 mesh).

All compounds used in the experiments (whether purchased or synthesised) were  $>95\%$  purity

### N-(2-methoxy-3-pyridyl)prop-2-enamide (**S-1**)

To a solution of 3-amino-2-methoxypyridine (376 mg, 3.03 mmol, 1.0 eq) and triethylamine (0.42 mL, 3.03 mmol, 1.0 eq) in  $\text{CH}_2\text{Cl}_2$  (10 mL) was added acryloyl chloride (0.26 mL, 3.03 mmol, 1.0 eq) at 0°C and the mixture was stirred for 3h under a nitrogen atmosphere. The resulting mixture was concentrated *in vacuo* and purified by silica gel column chromatography ( $\text{SiO}_2$ , *n*-hexane/ethyl acetate (2%  $\text{CH}_2\text{Cl}_2$ ); 98:2 to 50:50) to afford compound **S-1** (455 mg, 84%) as a colorless oil.  $^1\text{H-NMR}$  ( $\text{CDCl}_3$ )  $\delta$ : 4.03 (3H, s), 5.80 (1H, dd,  $J$  = 10.1, 1.2 Hz), 6.29 (1H, dd,  $J$  = 17.0, 10.1 Hz), 6.44 (1H, dd,  $J$  = 17.0, 1.2 Hz), 6.92 (1H, dd,  $J$  = 8.0, 4.9 Hz), 7.77 (1H, br s), 7.87 (1H, dd,  $J$  = 4.9, 1.8 Hz), 8.69 (1H, dd,  $J$  = 7.7, 1.8 Hz). ESI-LRMS: calcd for  $\text{C}_9\text{H}_{11}\text{N}_2\text{O}_2$  [(M+H) $^+$ ], 179.08; found, 179.2.

### N-(2-oxo-1H-pyridin-3-yl)prop-2-enamide (**2**)

To a solution of compound **S-1** (219 mg, 1.23 mmol, 1.0 eq) in 1,4-dioxane (3 mL) was added conc. HCl (1 mL, 32.0 mmol 26 eq) and water (2 mL) and the mixture was stirred at 60°C for 5h. The resulting mixture was concentrated *in vacuo* and purified by silica gel column chromatography ( $\text{SiO}_2$ , *n*-hexane/ethyl acetate; 80:20 to 0:100 to ethyl acetate/methanol; 100:0 to 90:10). The residue was suspended in *n*-hexane/ethyl acetate (10:1) and filtered. The solid was washed with *n*-hexane to afford compound **2** (43 mg, 21%)

as a purple solid. <sup>1</sup>H-NMR (DMSO-*d*<sub>6</sub>) δ: 5.70 (1H, dd, *J* = 10.4, 1.8 Hz), 6.18-6.27 (2H, m), 6.82 (1H, dd, *J* = 16.9, 10.1 Hz), 7.12 (1H, dd, *J* = 6.7, 1.8 Hz), 8.35 (1H, dd, *J* = 6.7, 1.8 Hz), 9.53 (1H, s), 11.99 (1H, br s). ESI-HRMS: calcd for C<sub>8</sub>H<sub>9</sub>N<sub>2</sub>O<sub>2</sub> [(M+H)<sup>+</sup>], 165.0658; found, 165.0661.

### N-(3-acetylphenyl)prop-2-enamide (**3**)

To a solution of 1-(3-aminophenyl)ethanone (126 mg, 0.93 mmol, 1.0 eq) and triethylamine (0.130 mL, 0.93 mmol, 1.0 eq) in CH<sub>2</sub>Cl<sub>2</sub> (3 mL) was added acryloyl chloride (0.080 mL, 0.93 mmol, 1.0 eq) at 0°C and the mixture was stirred for 0.5h under a nitrogen atmosphere. The resulting mixture was concentrated *in vacuo* and purified by silica gel column chromatography (SiO<sub>2</sub>, *n*-hexane/ethyl acetate; 95:5 to 20:80). The residue was suspended in *n*-hexane/ethyl acetate (5:1) and filtered. The solid was washed with *n*-hexane to afford compound **3** (125 mg, 71%) as a white solid. <sup>1</sup>H-NMR (CDCl<sub>3</sub>) δ: 2.62 (3H, s), 5.82 (1H, dd, *J* = 10.4, 1.2 Hz), 6.30 (1H, dd, *J* = 17.0, 10.4 Hz), 6.48 (1H, dd, *J* = 17.0, 1.2 Hz), 7.43-7.48 (1H, m), 7.67-7.75 (2H, m), 7.99 (1H, d, *J* = 8.0 Hz), 8.11 (1H, s). ESI-HRMS: calcd for C<sub>11</sub>H<sub>12</sub>NO<sub>2</sub> [(M+H)<sup>+</sup>], 190.0862; found, 190.0877.

### N-(6-acetamido-2-pyridyl)prop-2-enamide (**5**)

To a solution of N-(6-amino-2-pyridyl)acetamide (120 mg, 0.79 mmol, 1.0 eq) and triethylamine (0.120 mL, 0.79 mmol, 1.0 eq) in CH<sub>2</sub>Cl<sub>2</sub> (3 mL) was added acryloyl chloride (0.069 mL, 0.79 mmol, 1.0 eq) at 0°C and the mixture was stirred for 1h under a nitrogen atmosphere. The resulting mixture was concentrated *in vacuo* and purified by silica gel column chromatography (SiO<sub>2</sub>, *n*-hexane/ethyl acetate; 80:20 to 0:100 to ethyl acetate/methanol; 100:0 to 90:10). The residue was suspended in *n*-hexane/ethyl acetate (5:1) and filtered. The solid was washed with *n*-hexane to afford compound **5** (68.4 mg, 42%) as a white solid. <sup>1</sup>H-NMR (DMSO-*d*<sub>6</sub>) δ: 2.11 (3H, s), 5.78 (1H, dd, *J* = 9.8, 1.8 Hz), 6.30 (1H, dd, *J* = 16.9, 2.1 Hz), 6.66 (1H, dd, *J* = 16.9, 10.1 Hz), 7.72-7.78 (2H, m), 7.80-7.86 (1H, m), 10.09 (1H, s), 10.30 (1H, s). ESI-HRMS: calcd for C<sub>10</sub>H<sub>12</sub>N<sub>3</sub>O<sub>2</sub> [(M+H)<sup>+</sup>], 206.0924; found, 206.0934.

### N-(1-methylbenzimidazol-4-yl)prop-2-enamide (**7**)

To a solution of 4-amino-1-methylbenzimidazole dihydrochloride (144 mg, 0.65 mmol, 1.0 eq) and triethylamine (0.270 mL, 1.96 mmol, 3.0 eq) in CH<sub>2</sub>Cl<sub>2</sub> (3 mL) was added acryloyl chloride (0.059 mL, 0.69 mmol, 1.05 eq) at 0°C and the mixture was stirred for 1h under a nitrogen atmosphere. The resulting mixture was concentrated *in vacuo* and purified by silica gel column chromatography (SiO<sub>2</sub>, ethyl acetate/methanol (2% CH<sub>2</sub>Cl<sub>2</sub>); 100:0 to 90:10). The residue was suspended in *n*-hexane/ethyl acetate (5:1) and filtered. The solid was washed with *n*-hexane to afford compound **7** (70.9 mg, 54%) as a white solid. <sup>1</sup>H-NMR (CDCl<sub>3</sub>) δ: 3.86 (3H, s), 5.80 (1H, dd, *J* = 9.8, 1.8 Hz), 6.41 (1H, dd, *J* = 16.6, 9.8 Hz), 6.50 (1H, dd, *J* =

16.6, 1.8 Hz), 7.14 (1H, d,  $J = 7.4$  Hz), 7.30-7.36 (1H, m), 7.80 (1H, s), 8.36 (1H, d,  $J = 8.0$  Hz), 8.63 (1H, br s). ESI-HRMS: calcd for  $C_{11}H_{12}N_3O$  [(M+H)<sup>+</sup>], 202.0975; found, 202.0975.

### N-(7-quinoly1)prop-2-enamide (**8**)

To a solution of 7-aminoquinoline (123 mg, 0.85 mmol, 1.0 eq) and triethylamine (0.119 mL, 0.85 mmol, 1.0 eq) in  $CH_2Cl_2$  (3 mL) was added acryloyl chloride (0.073 mL, 0.85 mmol, 1.0 eq) at 0°C and the mixture was stirred for 1h under a nitrogen atmosphere. The resulting mixture was concentrated *in vacuo* and purified by silica gel column chromatography ( $SiO_2$ , *n*-hexane/ethyl acetate; 95:5 to 20:80). The residue was suspended in *n*-hexane/ethyl acetate (5:1) and filtered. The solid was washed with *n*-hexane to afford compound **8** (110 mg, 65%) as a white solid. <sup>1</sup>H-NMR ( $CDCl_3$ )  $\delta$ : 5.79 (1H, dd,  $J = 10.2, 1.2$  Hz), 6.33 (1H, dd,  $J = 17.0, 10.2$  Hz), 6.49 (1H, dd,  $J = 17.0, 1.2$  Hz), 7.33 (1H, dd,  $J = 8.0, 4.3$  Hz), 7.78 (1H, d,  $J = 9.2$  Hz), 8.04-8.14 (3H, m), 8.25 (1H, br s), 8.86 (1H, dd,  $J = 4.3, 1.8$  Hz). ESI-HRMS: calcd for  $C_{12}H_{11}N_2O$  [(M+H)<sup>+</sup>], 199.0866; found, 199.0855.

### N-[7-(dimethylamino)-2-methyl-pyrazolo[1,5-a]pyrimidin-5-yl]prop-2-enamide (**9**)

To a solution of N7,N7,2-trimethylpyrazolo[1,5-a]pyrimidine-5,7-diamine (61 mg, 0.30 mmol, 1.0 eq) and triethylamine (0.43 mL, 0.30 mmol, 1.0 eq) in  $CH_2Cl_2$  (3 mL) was added acryloyl chloride (0.027 mL, 0.30 mmol, 1.0 eq) at 0°C and the mixture was stirred for 1h under a nitrogen atmosphere. The resulting mixture was concentrated *in vacuo* and purified by silica gel column chromatography ( $SiO_2$ , *n*-hexane/ethyl acetate; 80:20 to 0:100). The residue was suspended in *n*-hexane/ethyl acetate (5:1) and filtered. The solid was washed with *n*-hexane to afford compound **9** (12.1 mg, 16%) as a white solid. <sup>1</sup>H-NMR ( $CDCl_3$ )  $\delta$ : 2.45 (3H, s), 3.36 (6H, s), 5.84 (1H, d,  $J = 10.4$  Hz), 6.05 (1H, s), 6.23 (1H, dd,  $J = 16.5, 10.4$  Hz), 6.47 (1H, d,  $J = 16.5$  Hz), 7.24 (1H, s), 8.04 (1H, br s). ESI-HRMS: calcd for  $C_{12}H_{16}N_5O$  [(M+H)<sup>+</sup>], 246.1349; found, 246.1351.

### N-pyrazolo[1,5-a]pyridin-2-ylprop-2-enamide (**10**)

To a solution of pyrazolo[1,5-a]pyridin-2-amine (120 mg, 0.86 mmol, 1.0 eq) and triethylamine (0.12 mL, 0.86 mmol, 1.0 eq) in  $CH_2Cl_2$  (3 mL) was added acryloyl chloride (0.074 mL, 0.86 mmol, 1.0 eq) at 0°C and the mixture was stirred for 2h under a nitrogen atmosphere. The resulting mixture was concentrated *in vacuo* and purified by silica gel column chromatography ( $SiO_2$ , *n*-hexane/ethyl acetate; 90:10 to 0:100). The residue was suspended in *n*-hexane/ethyl acetate (5:1) and filtered. The solid was washed with *n*-hexane to afford compound **10** (107 mg, 67%) as a white solid. <sup>1</sup>H-NMR ( $CDCl_3$ )  $\delta$ : 5.80 (1H, dd,  $J = 10.2, 1.2$  Hz), 6.27 (1H, dd,  $J = 17.0, 10.2$  Hz), 6.48 (1H, dd,  $J = 17.0, 1.2$  Hz), 6.70-6.75 (1H, m), 7.08 (1H, s), 7.10-7.15 (1H, m), 7.45-7.49 (1H, m), 8.26 (1H, d,  $J = 8.0$  Hz), 8.68 (1H, br s). ESI-HRMS: calcd for  $C_{10}H_{10}N_3O$  [(M+H)<sup>+</sup>], 188.0818; found, 188.0820.

### N-(2,3-dimethylindazol-6-yl)prop-2-enamide (**11**)

To a solution of 2,3-dimethyl-2H-indazol-6-amine (127 mg, 0.76 mmol, 1.0 eq) and triethylamine (0.106 mL, 0.76 mmol, 1.0 eq) in CH<sub>2</sub>Cl<sub>2</sub> (3 mL) was added acryloyl chloride (0.066 mL, 0.76 mmol, 1.0 eq) at 0°C and the mixture was stirred for 1h under a nitrogen atmosphere. The resulting mixture was concentrated *in vacuo* and purified by silica gel column chromatography (SiO<sub>2</sub>, CH<sub>2</sub>Cl<sub>2</sub>/methanol; 100:0 to 88:12). The residue was suspended in *n*-hexane/ethyl acetate (5:1) and filtered. The solid was washed with *n*-hexane to afford compound **11** (84.9 mg, 52%) as a light-yellow solid. <sup>1</sup>H-NMR (DMSO-*d*<sub>6</sub>) δ: 2.56 (3H, s), 4.00 (3H, s), 5.75 (1H, dd, *J* = 10.1, 2.1 Hz), 6.26 (1H, dd, *J* = 16.9, 2.1 Hz), 6.46 (1H, dd, *J* = 16.9, 10.1 Hz), 7.04 (1H, dd, *J* = 9.0, 1.5 Hz), 7.59 (1H, d, *J* = 9.0 Hz), 8.08 (1H, s), 10.10 (1H, s). ESI-HRMS: calcd for C<sub>12</sub>H<sub>14</sub>N<sub>3</sub>O [(M+H)<sup>+</sup>], 216.1131; found, 216.1119.

### N-(4-phenylpyridin-2-yl)prop-2-enamide (**12**)

To 2-Amino-4-phenylpyridine (100 mg, 0.59 mmol, 1 eq) in DCM (6 mL) was added triethylamine (0.04 mL, 0.29 mmol, 0.5 eq) and stirred at 0°C for 10min. Acryloyl chloride (0.04 mL, 1.12 g/mL, 0.53 mmol, 0.9 eq) was added drop wise and the reaction stirred for 1h over an ice bath. The reaction was quenched with saturated NaHCO<sub>3</sub> (aq), extracted with DCM and the organics filtered through a phase separator and evaporated to a crude residue. The pure compound was isolated by preparative HPLC automated flash chromatography (Teledyne ISCO ACCQ, Prep HPLC Column: Gemini 5 μm; pH=neutral Dimensions: 21 mm x 150 mm; elution of A/B (95/5) to A/B (4/96), (A: water; B: MeCN) and selected fractions were combined and freeze dried to afford the title compound (5.1 mg, 0.02 mmol, 4.3%) as a cream solid. <sup>1</sup>H NMR (400 MHz, DMSO-*d*<sub>6</sub>) δ: 5.74 (dd, *J* = 10.1, 1.9 Hz, 1H), 6.27 (dd, *J* = 17.0, 1.9 Hz, 1H), 6.59 (dd, *J* = 17.0, 10.1 Hz, 1H), 7.38 (dd, *J* = 5.2, 1.7 Hz, 1H), 7.38 - 7.47 (m, 1H), 7.43 - 7.53 (m, 2H), 7.62 - 7.71 (m, 2H), 8.34 (dd, *J* = 5.3, 0.8 Hz, 1H), 8.47 (dd, *J* = 1.8, 0.8 Hz, 1H), 10.78 (s, 1H). ESI-HRMS: calcd for C<sub>14</sub>H<sub>13</sub>N<sub>2</sub>O [(M+H)<sup>+</sup>], 225.1022; found, 225.1023.

### 4-(1-methylindol-3-yl)pyridin-2-amine (**S-2**)

To a suspension of 2-amino-4-chloropyridine (100 mg, 0.78 mmol, 1.0 eq), 1-methyl-3-(4,4,5,5-tetramethyl-1,3,2-dioxaborolan-2-yl)-1H-indole (300 mg, 1.17 mmol, 1.5 eq) and K<sub>3</sub>PO<sub>4</sub> (495 mg, 2.33 mmol, 3.0 eq) in 1,4-dioxane (3 mL), ethanol (1 mL) and water (0.8 mL) was added XPhos Pd G2 (61.2 mg, 0.078 mmol, 0.1 eq) and the mixture was stirred at 120°C with microwave irradiation for 3h under a nitrogen atmosphere, and then cooled to room temperature. The reaction mixture was purified by silica gel column chromatography (SiO<sub>2</sub>, CH<sub>2</sub>Cl<sub>2</sub>/methanol; 97:3 to 89:11) to afford compound **S-2** (122 mg, 70%) as a pale-yellow solid. <sup>1</sup>H-NMR (CDCl<sub>3</sub>) δ: 3.85 (3H, s), 4.45 (2H, s), 6.81-6.83 (1H, m), 6.96 (1H, dd,

$J = 5.5, 1.6$  Hz), 7.20-7.25 (1H, m), 7.28-7.33 (1H, m), 7.36-7.40 (2H, m), 7.94-7.98 (1H, m), 8.06-8.09 (1H, m). ESI-LRMS: calcd for  $C_{14}H_{14}N_3$  [(M+H)<sup>+</sup>], 224.12; found, 224.2.

### N-[4-(1-methylindol-3-yl)-2-pyridyl]prop-2-enamide (**13**)

To a solution of compound **S-2** (60.0 mg, 0.27 mmol, 1.0 eq) and triethylamine (0.112 mL, 0.81 mmol, 3.0 eq) in  $CH_2Cl_2$  (5 mL) was added acryloyl chloride (0.063 mL, 0.78 mmol, 2.9 eq) at  $-78^\circ C$  and the mixture was stirred for 10 minutes under a nitrogen atmosphere. Saturated aqueous  $NaHCO_3$  and water were added and the mixture was warmed up to room temperature with vigorous stirring. The resulting mixture was extracted with  $CH_2Cl_2$  and the combined organic layers were washed with water, saturated aqueous  $NaHCO_3$  and brine, then dried over  $Na_2SO_4$ , filtered, and concentrated *in vacuo*. The residue was purified by silica gel column chromatography ( $SiO_2$ ,  $CH_2Cl_2$ /methanol; 100:0 to 94:6) and purified again by silica gel column chromatography ( $SiO_2$ , *n*-hexane/ethyl acetate; 61:39 to 40:60) to afford compound **13** (35 mg, 47%) as a white solid.  $^1H$ -NMR ( $CDCl_3$ )  $\delta$ : 3.86 (3H, s), 5.83 (1H, dd,  $J = 10.3, 1.2$  Hz), 6.33 (1H, dd,  $J = 17.0, 10.3$  Hz), 6.51 (1H, dd,  $J = 17.0, 1.2$  Hz), 7.27-7.34 (2H, m), 7.38-7.42 (2H, m), 7.55 (1H, s), 8.06-8.11 (1H, m), 8.26-8.28 (1H, m), 8.61 (1H, br s), 8.68-8.69 (1H, m). ESI-HRMS: calcd for  $C_{17}H_{16}N_3O$  [(M+H)<sup>+</sup>], 278.1288; found, 278.1276.

### 6-(1-methylindol-3-yl)pyrimidin-4-amine (**S-3**)

To a suspension of 4-amino-6-chloropyrimidine (147 mg, 1.13 mmol, 1.0 eq), 1-methyl-3-(4,4,5,5-tetramethyl-1,3,2-dioxaborolan-2-yl)-1H-indole (326 mg, 1.27 mmol, 1.12 eq) and  $K_3PO_4$  (725 mg, 3.42 mmol, 3.01 eq) in 1,4-dioxane (3 mL) and water (0.6 mL) was added  $Pd(dppf)_2Cl_2$  (144 mg, 0.176 mmol, 0.155 eq) and the mixture was stirred at  $110^\circ C$  with microwave irradiation for 2h under a nitrogen atmosphere, and then cooled to room temperature. The reaction mixture was filtered through a Celite pad, washed with 1,4-dioxane and  $CH_2Cl_2$  and concentrated *in vacuo*. The residue was purified by silica gel column chromatography ( $SiO_2$ , *n*-hexane/ethyl acetate (2%  $CH_2Cl_2$ ); 90:10 to 0:100 to ethyl acetate/methanol (2%  $CH_2Cl_2$ ); 100:0 to 90:10) to afford compound **S-3** (57 mg, 22%) as a brown solid.  $^1H$ -NMR ( $DMSO-d_6$ )  $\delta$ : 3.86 (3H, s), 6.67 (2H, br s), 6.83 (1H, d,  $J = 1.2$  Hz), 7.16-7.21 (1H, m), 7.22-7.27 (1H, m), 7.52 (1H, d,  $J = 8.0$  Hz), 8.07 (1H, s), 8.22 (1H, d,  $J = 8.0$  Hz), 8.35 (1H, d,  $J = 1.2$  Hz). ESI-LRMS: calcd for  $C_{13}H_{13}N_4$  [(M+H)<sup>+</sup>], 225.11; found, 225.1.

### N-[6-(1-methylindol-3-yl)pyrimidin-4-yl]prop-2-enamide (**14**)

To a solution of compound **S-3** (57.0 mg, 0.254 mmol, 1.0 eq) and triethylamine (0.11 mL, 0.79 mmol, 3.1 eq) in  $CH_2Cl_2$  (1.2 mL) and DMF (0.6 mL) was added acryloyl chloride (0.06 mL, 0.742 mmol, 2.92 eq) at  $-78^\circ C$  and the mixture was stirred for 1.5h under a nitrogen



atmosphere. The reaction was quenched with saturated aqueous NaHCO<sub>3</sub> and water. The mixture was warmed up to room temperature and vigorously stirred for 2.5h. The resulting mixture was extracted with ethyl acetate and the combined organic layers were washed with water and brine, then dried over Na<sub>2</sub>SO<sub>4</sub>, filtered, and concentrated *in vacuo*. The residue was purified by silica gel column chromatography (SiO<sub>2</sub>, *n*-hexane/ethyl acetate (2% CH<sub>2</sub>Cl<sub>2</sub>); 90:10 to 0:100 to ethyl acetate/methanol (2% CH<sub>2</sub>Cl<sub>2</sub>); 100:0 to 95:5) to afford compound **14** (30.6 mg, 43%) as a white solid. <sup>1</sup>H-NMR (DMSO-*d*<sub>6</sub>) δ: 3.91 (3H, s), 5.89 (1H, dd, *J* = 10.0, 1.8 Hz), 6.41 (1H, dd, *J* = 17.2, 1.8 Hz), 6.66 (1H, dd, *J* = 17.2, 10.0 Hz), 7.23-7.32 (2H, m), 7.54-7.58 (1H, m), 8.30-8.36 (2H, m), 8.60 (1H, d, *J* = 1.2 Hz), 8.83 (1H, d, *J* = 1.2 Hz), 11.02 (1H, br s). ESI-HRMS: calcd for C<sub>16</sub>H<sub>15</sub>N<sub>4</sub>O [(M+H)<sup>+</sup>], 279.1240; found, 279.1270.

### S-1 <sup>1</sup>HNMR

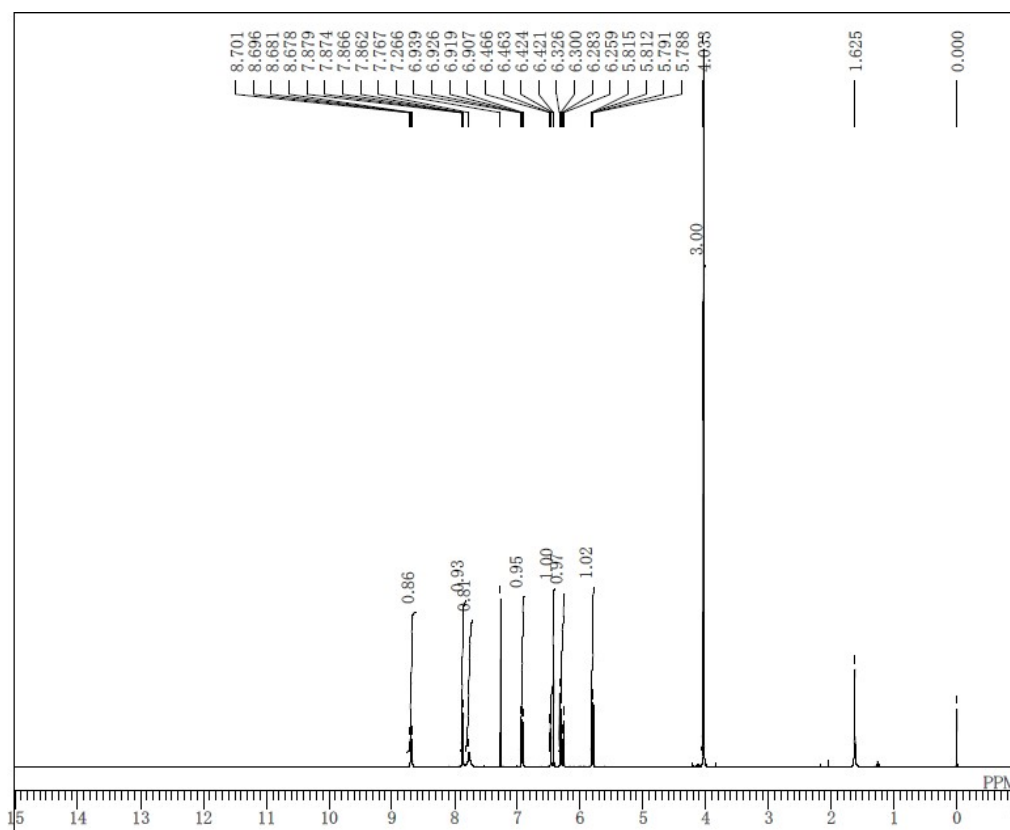

### 2 <sup>1</sup>HNMR

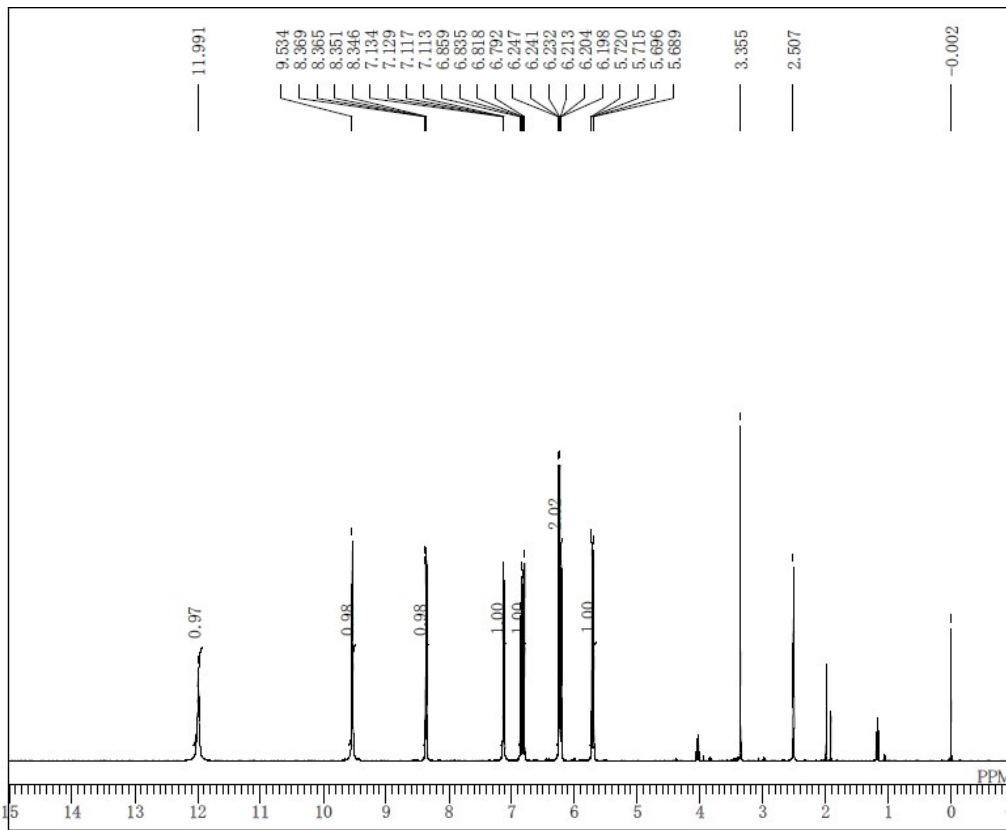

### 3\_ <sup>1</sup>H NMR

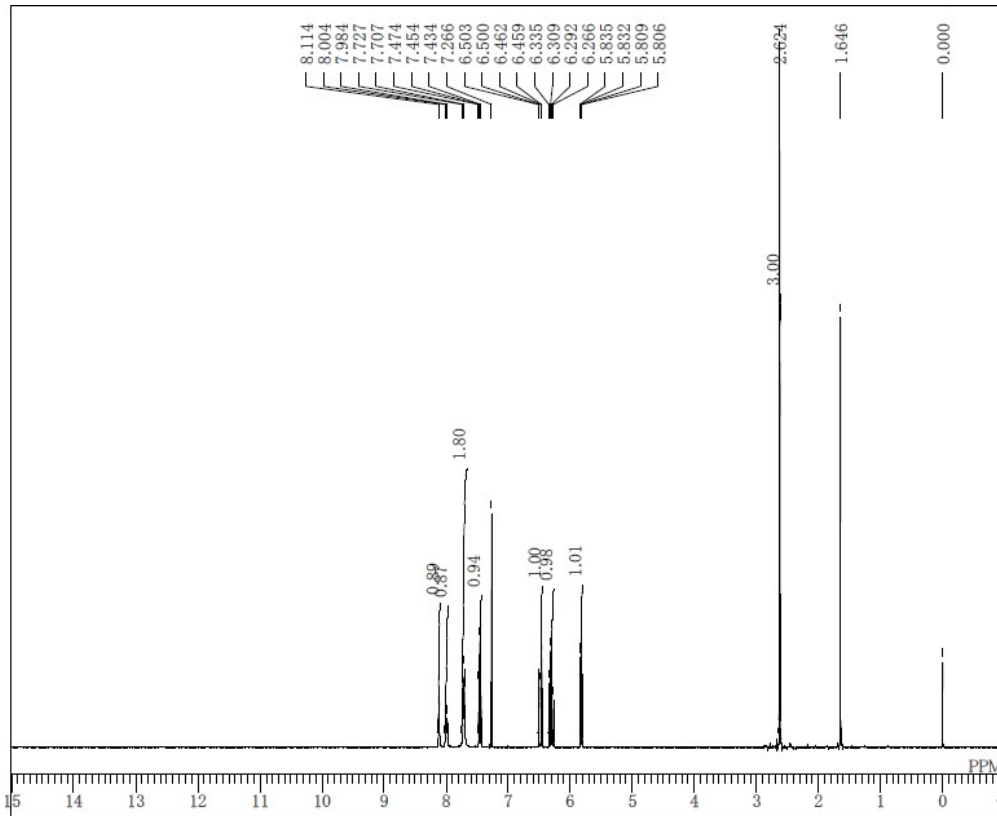

### 5\_ <sup>1</sup>H NMR

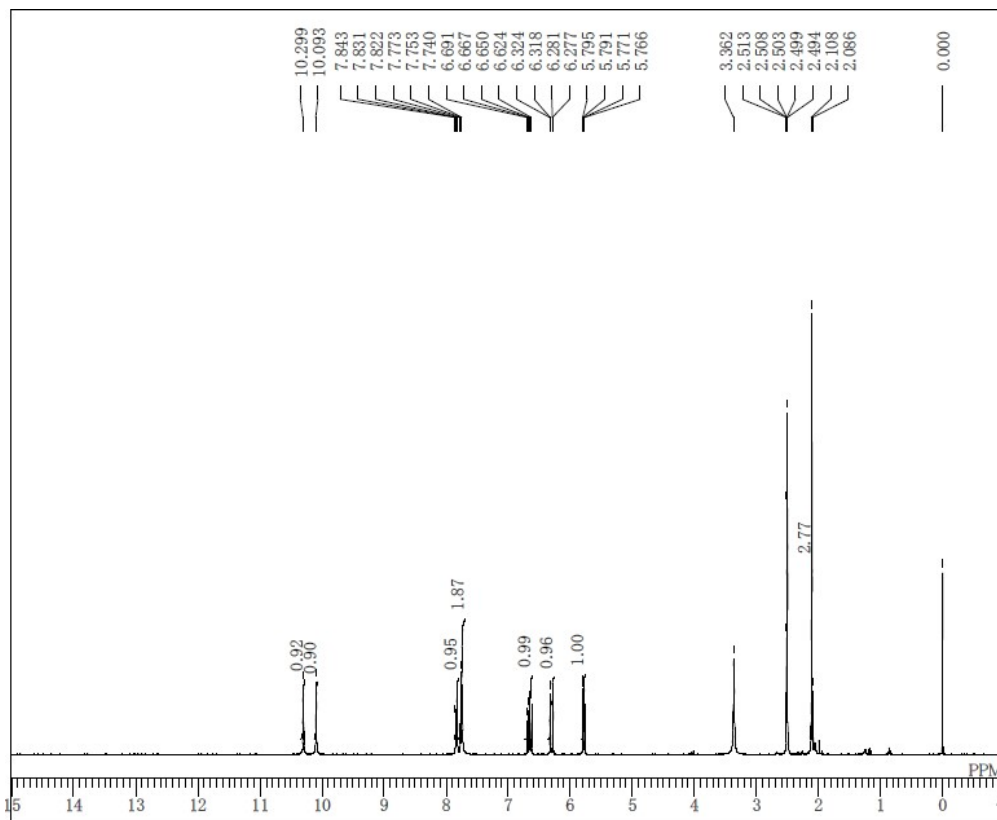

### 7\_ <sup>1</sup>H NMR

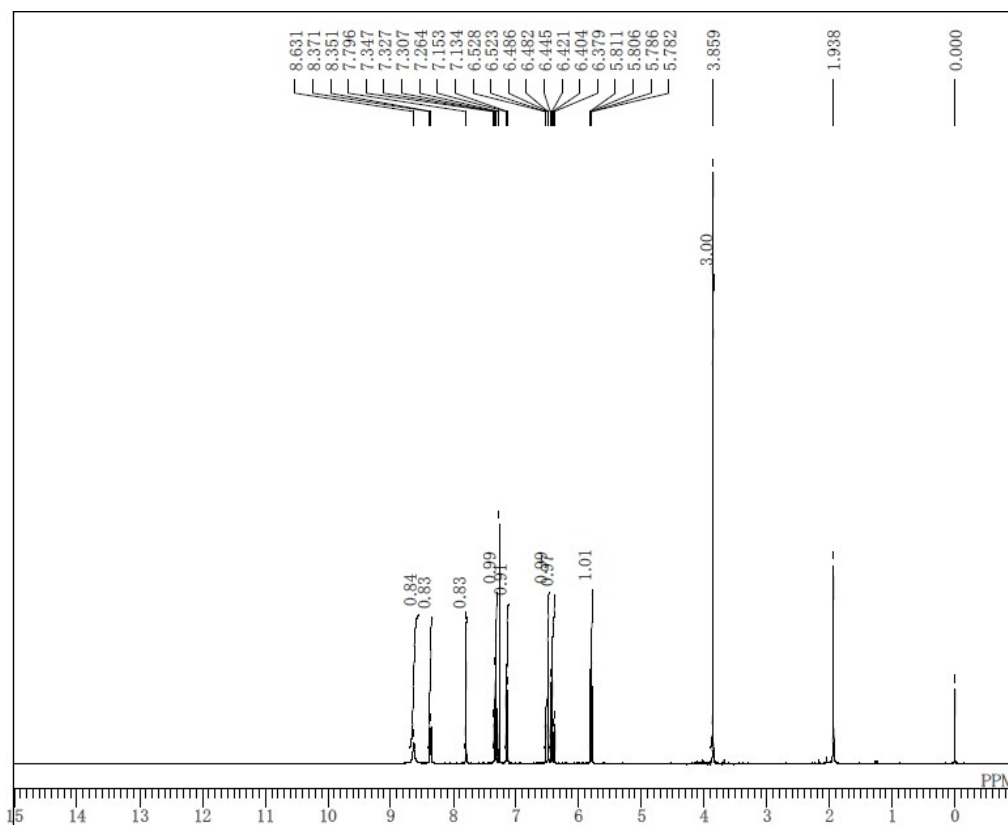

## 8 <sup>1</sup>H NMR

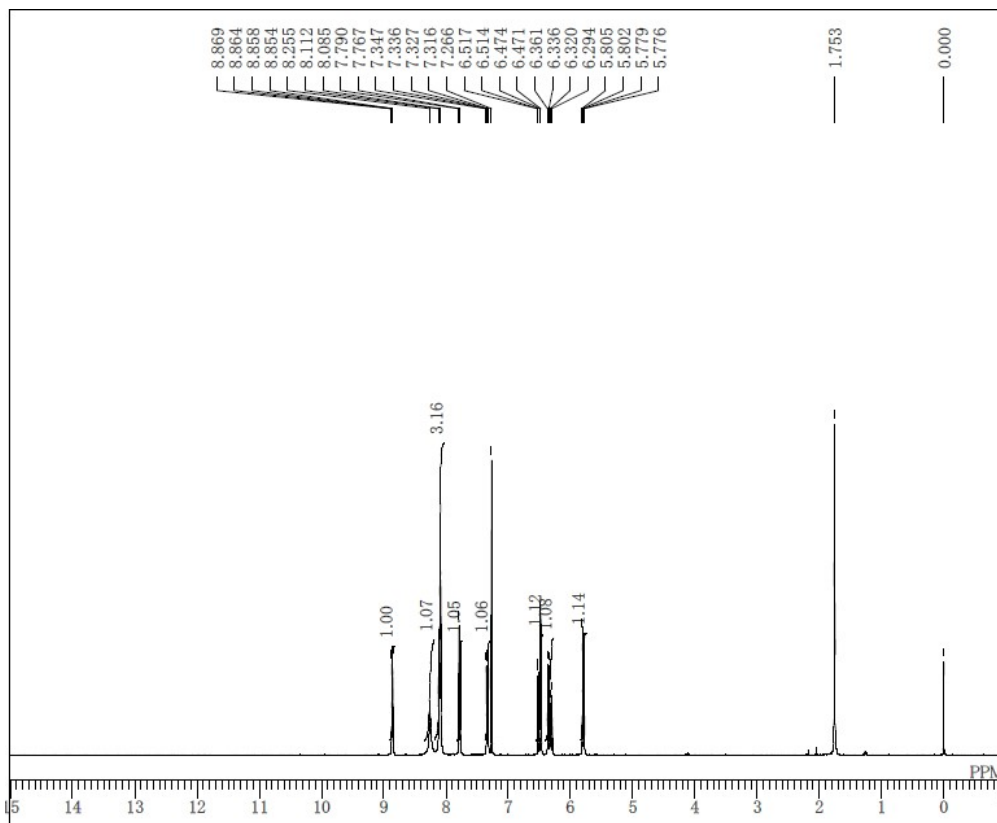

## 9 <sup>1</sup>H NMR

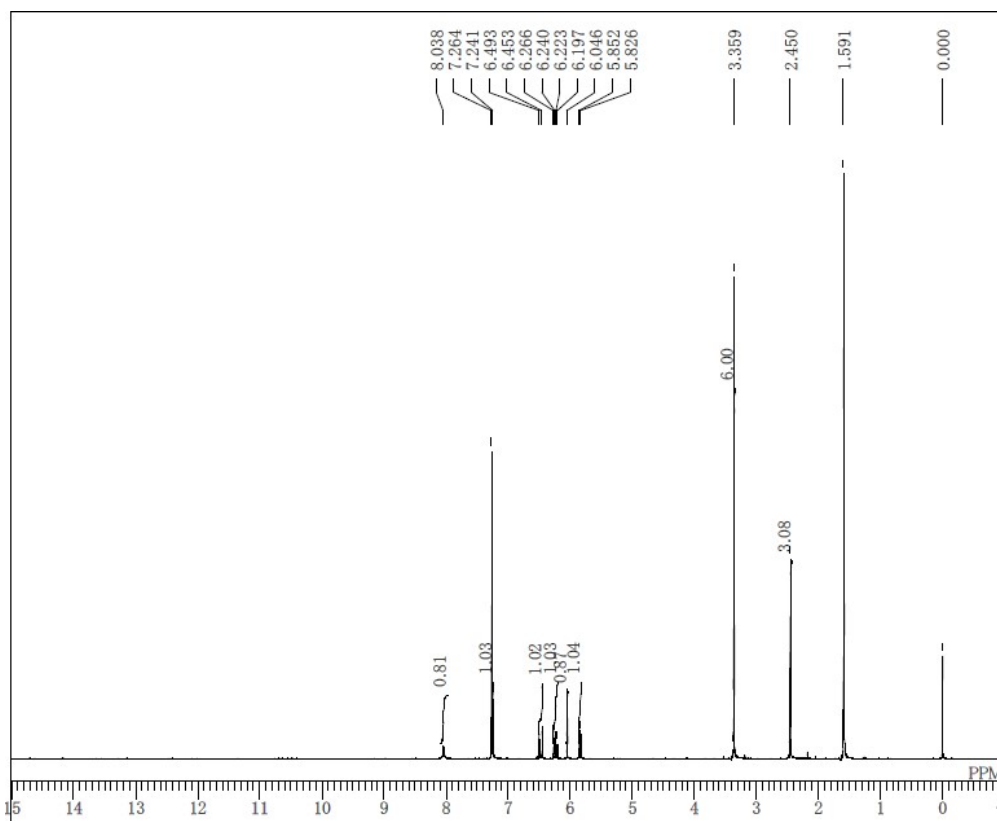

### 10 <sup>1</sup>HNMR

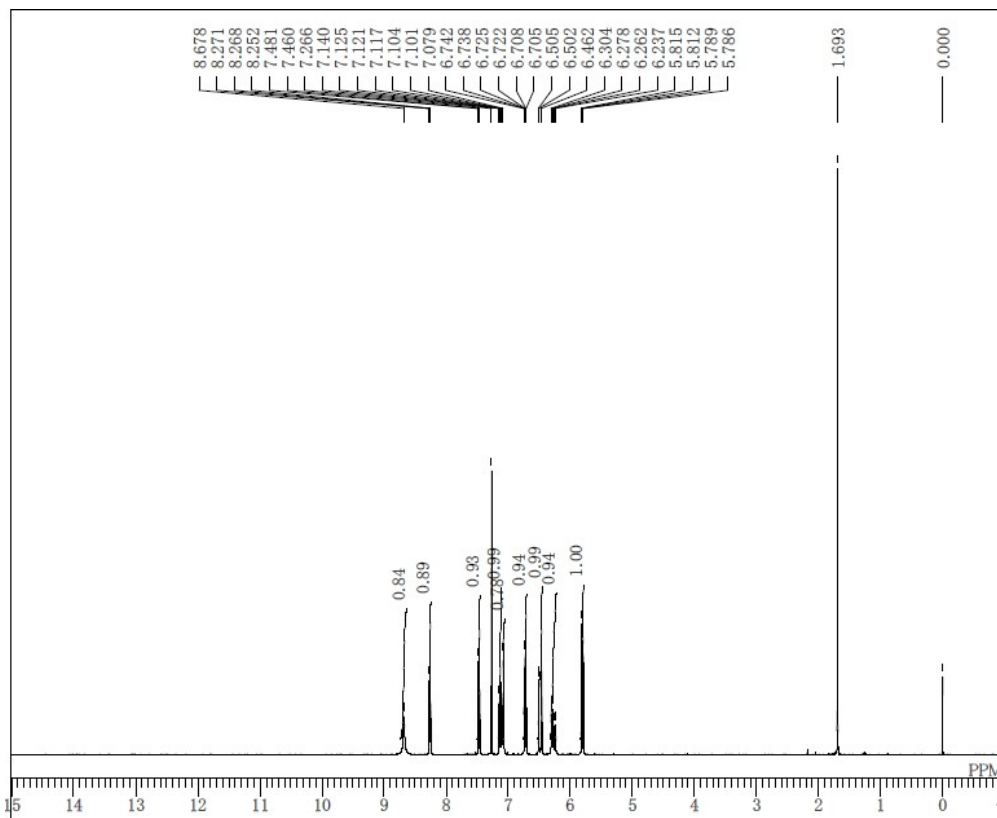

### 11 <sup>1</sup>HNMR

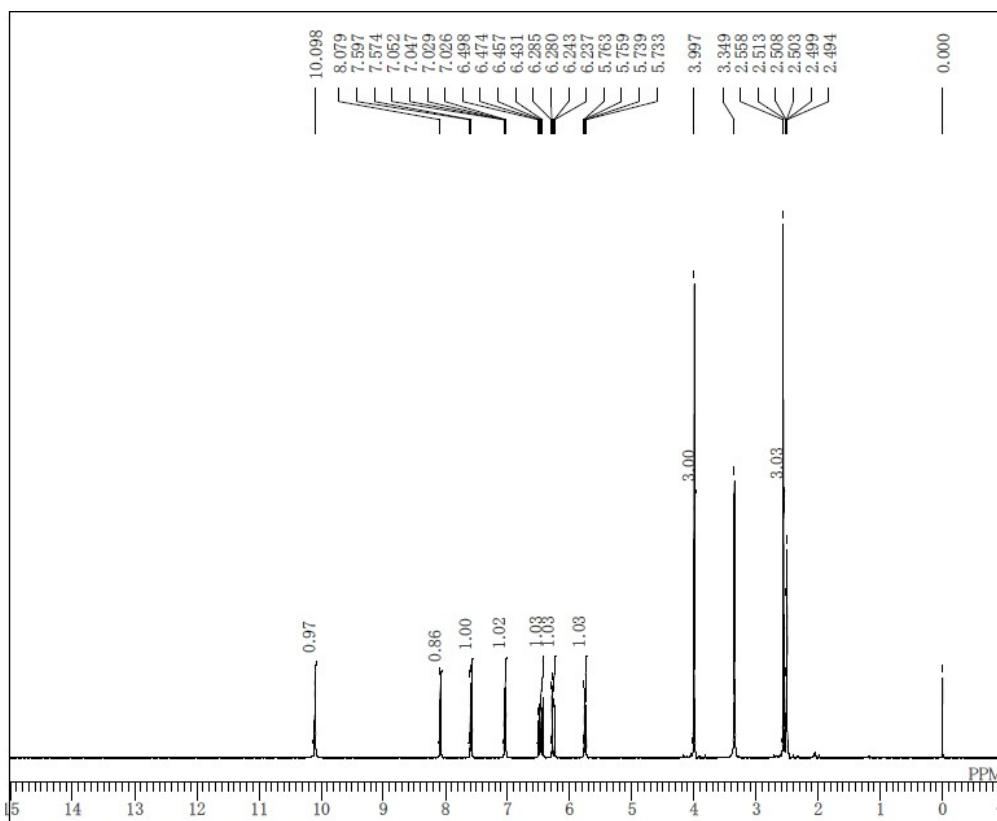

## 12 <sup>1</sup>H NMR

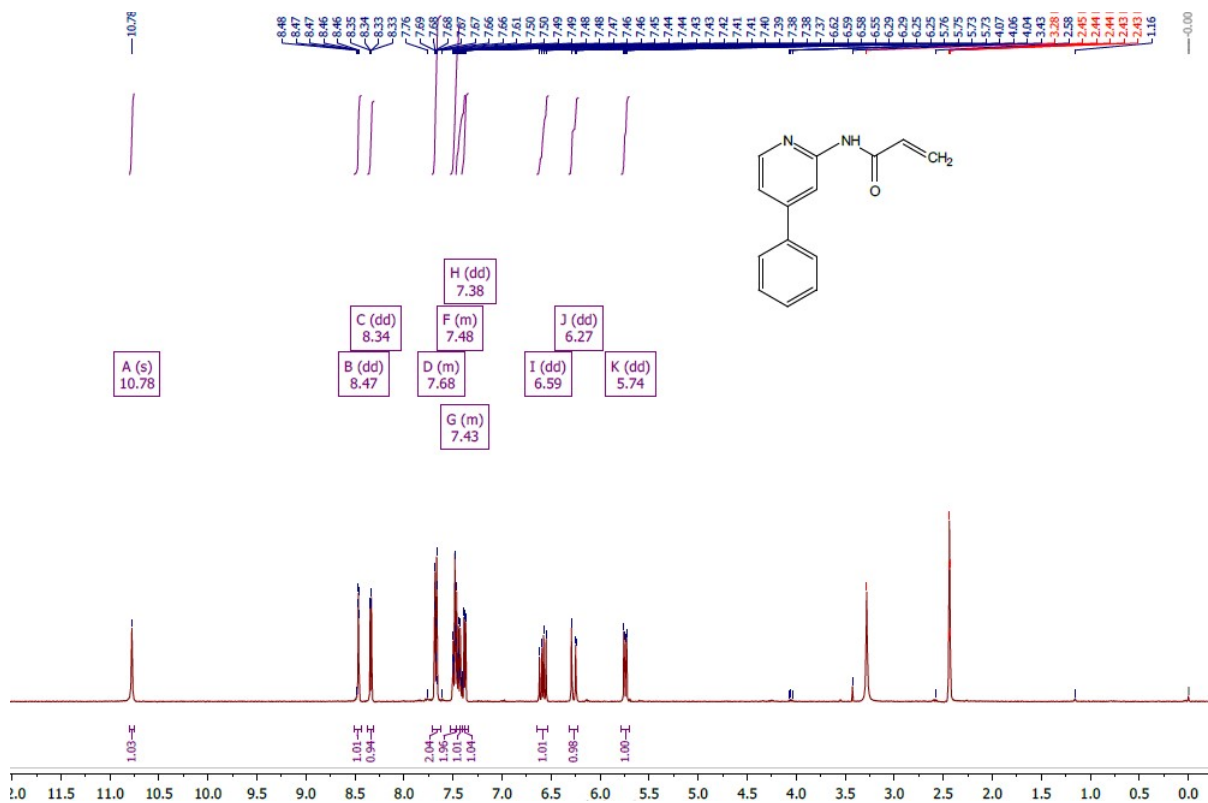

## S-2 <sup>1</sup>H NMR

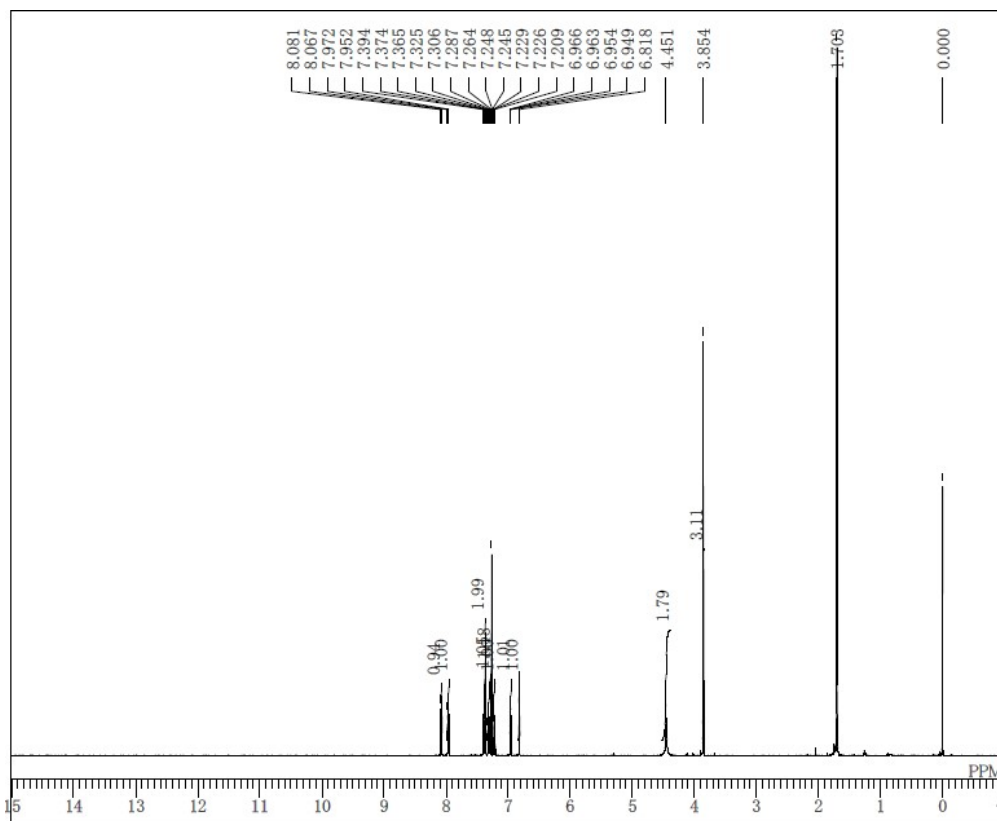

### 13 <sup>1</sup>HNMR

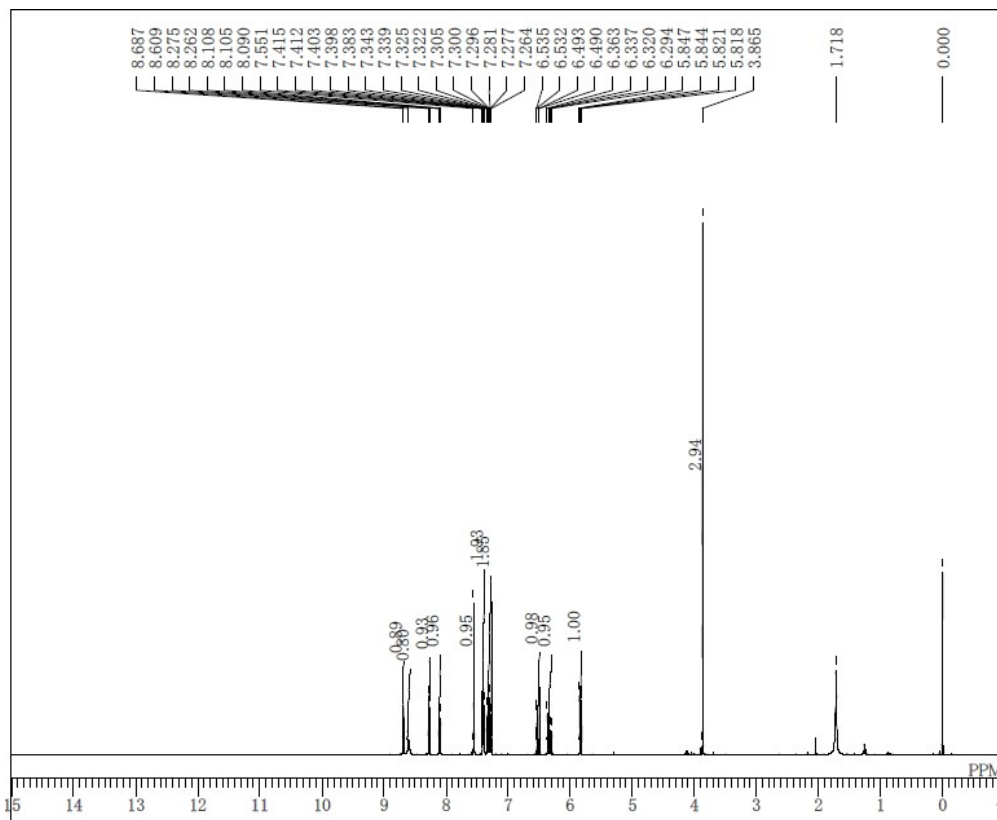

### S-3 <sup>1</sup>HNMR

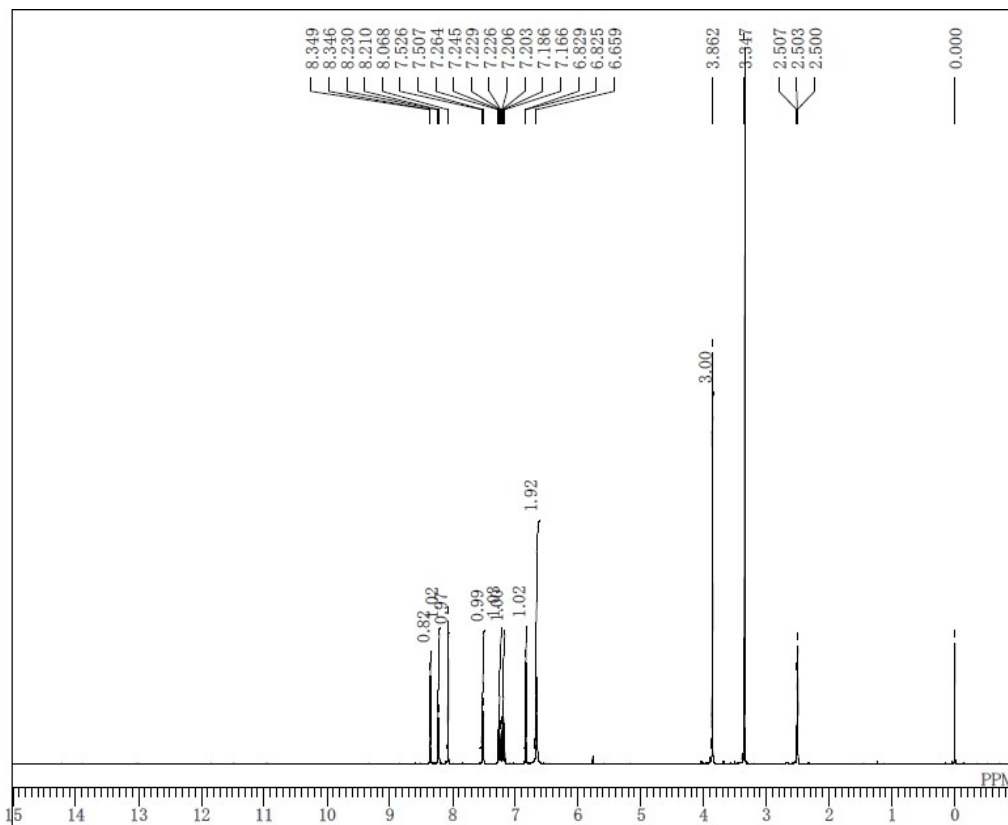

### 14\_1HNMR

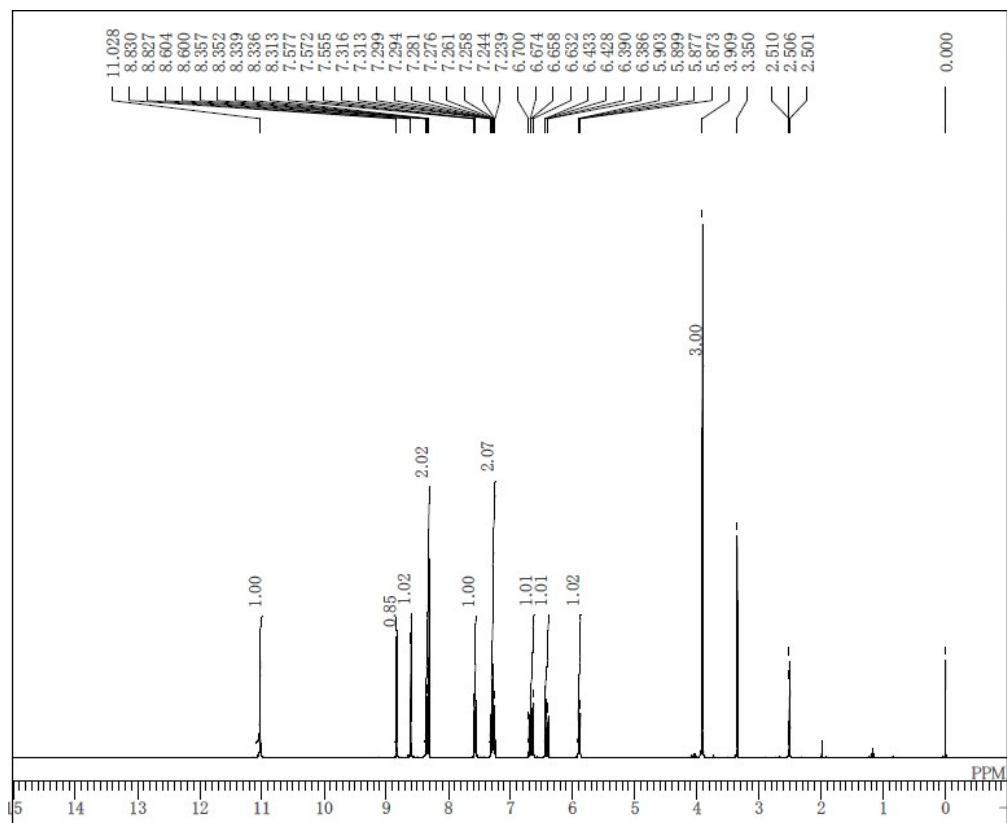

### 14\_ESI-HRMS

1: TOF MS ES+ :279.125 0.05Da

1.07e4

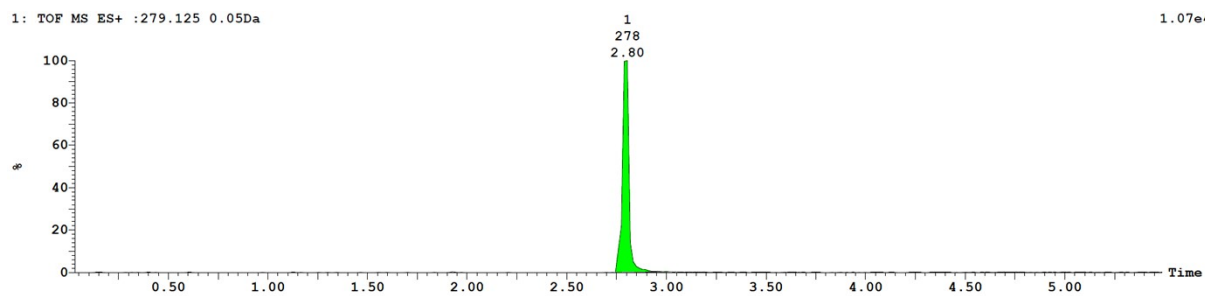

| Peak ID | Time | m/z Found | Mass     | Mass Difference | mDa | PPM | Formula                                          |
|---------|------|-----------|----------|-----------------|-----|-----|--------------------------------------------------|
| 1       | 2.80 | 279.1270  | 278.1188 | 0.0025          | 2.4 | 8.8 | C <sub>16</sub> H <sub>14</sub> N <sub>4</sub> O |

1 Combine (181:183-(176:177+198:199)) Parent Status: OK

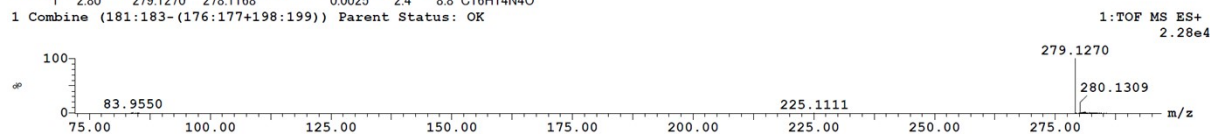



## Supplementary Figures

Figure S1: overlay of ATP binding pocket in the structures of EGFR, TTBK1 and MELK kinases

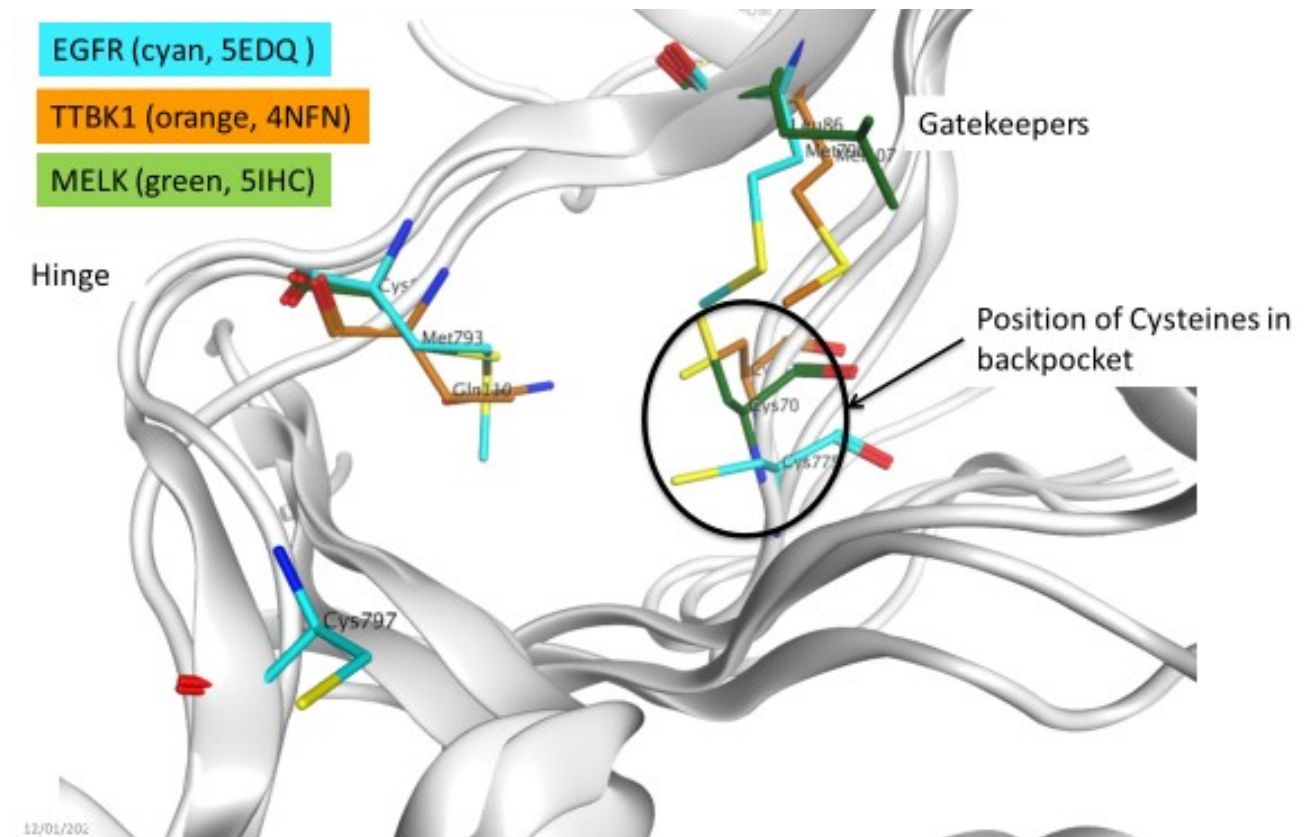

Figure S2: Comparison of the structure of **4** bound to EGFR\_wtX, EGFR\_DMx and EGFR\_TMx

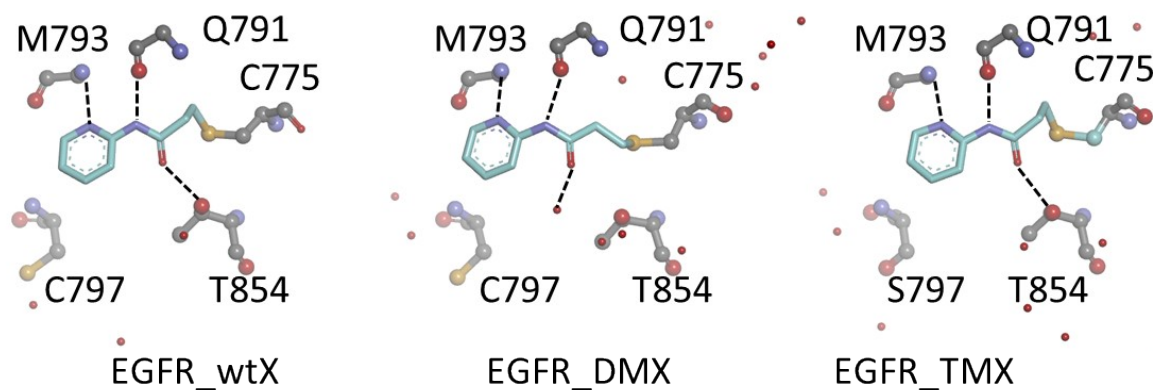

Labelled amino acids in ball and stick (grey carbon atoms) with main chain only for Q791 and M793, **4** in stick (light blue carbons), hydrogen bonds in dashed lines in the crystal structures of EGFR\_wtX (PDB code: 8HV2 ), EGFR\_DMx (PDB code: 8HV3 ) and EGFR\_TMx (PDB code: 8HV4 )

Figure S3. Comparison of the predicted binding pose of acrylamide compounds with that observed in crystal structures

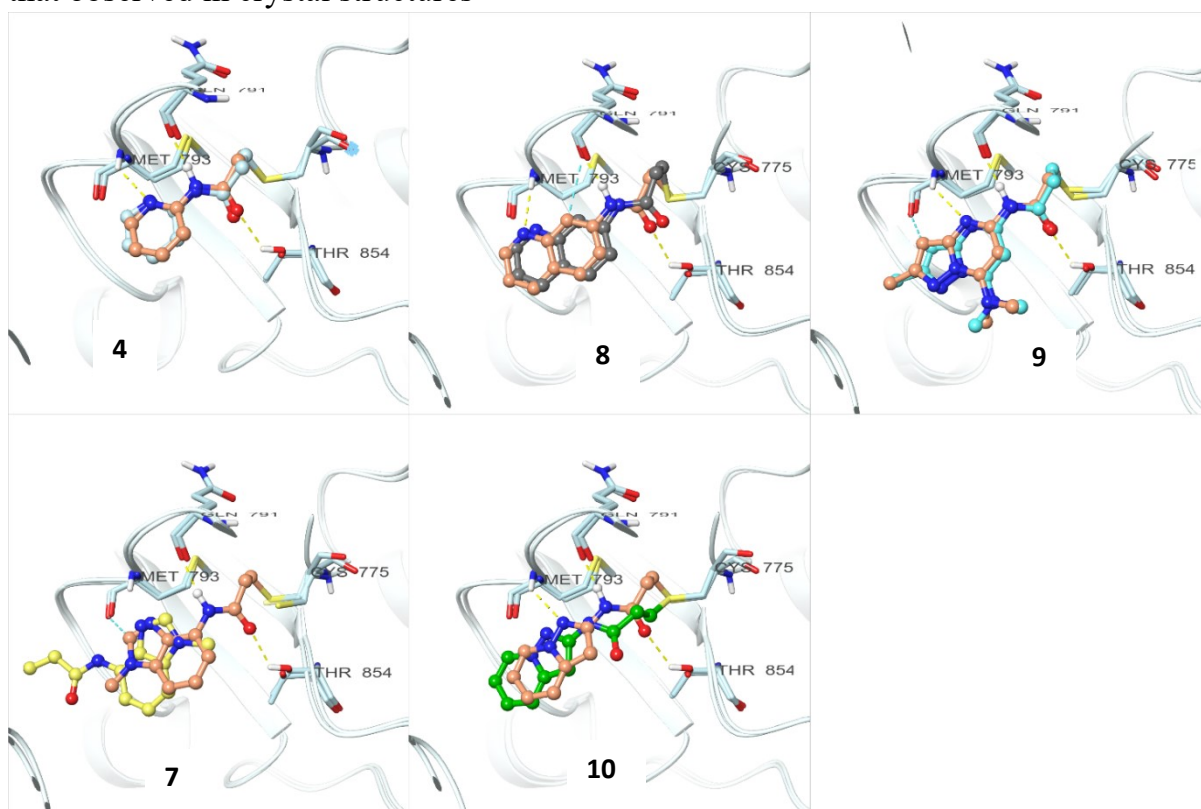

| Compound | 4    | 7    | 8    | 9    | 10   |
|----------|------|------|------|------|------|
| PDB code | 8HV4 | 8HV5 | 8HV6 | 8HV7 | 8HV8 |

Figure S4: MS of EGFR\_SM2 and EGFR\_DM2 incubated with compound 14

### EGFR\_SM2

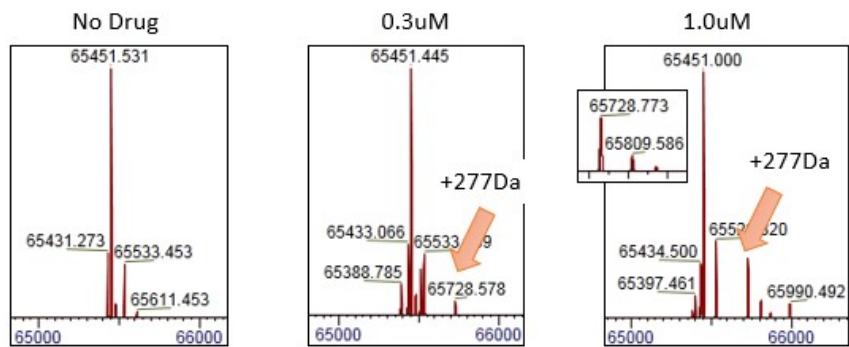

### EGFR\_DM2

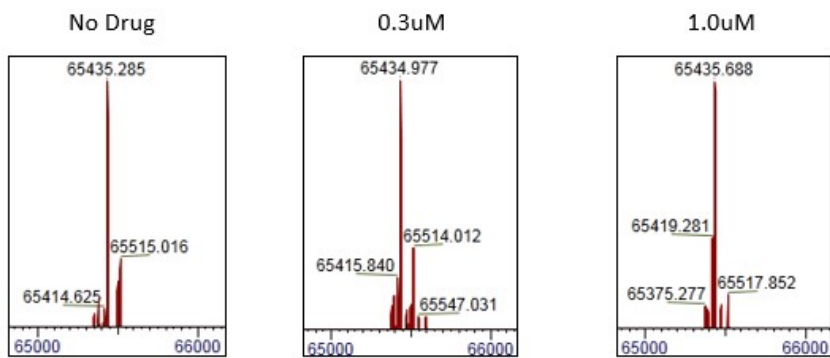

Figure S5: Inhibition of a panel of 68 kinases by compound **14**

EGFR: EGFR\_wt, EGFR(d/TM/CS), deletion 746-750 and double mutant T790M and C797S,  
 EGFR(TM/CS/LR): EGFR\_TM, EGFR\_CS, EGFR\_LR, wild type mutant T790M,  
 EGFR(TM/LR): EGFR\_DM, EGFR\_LR

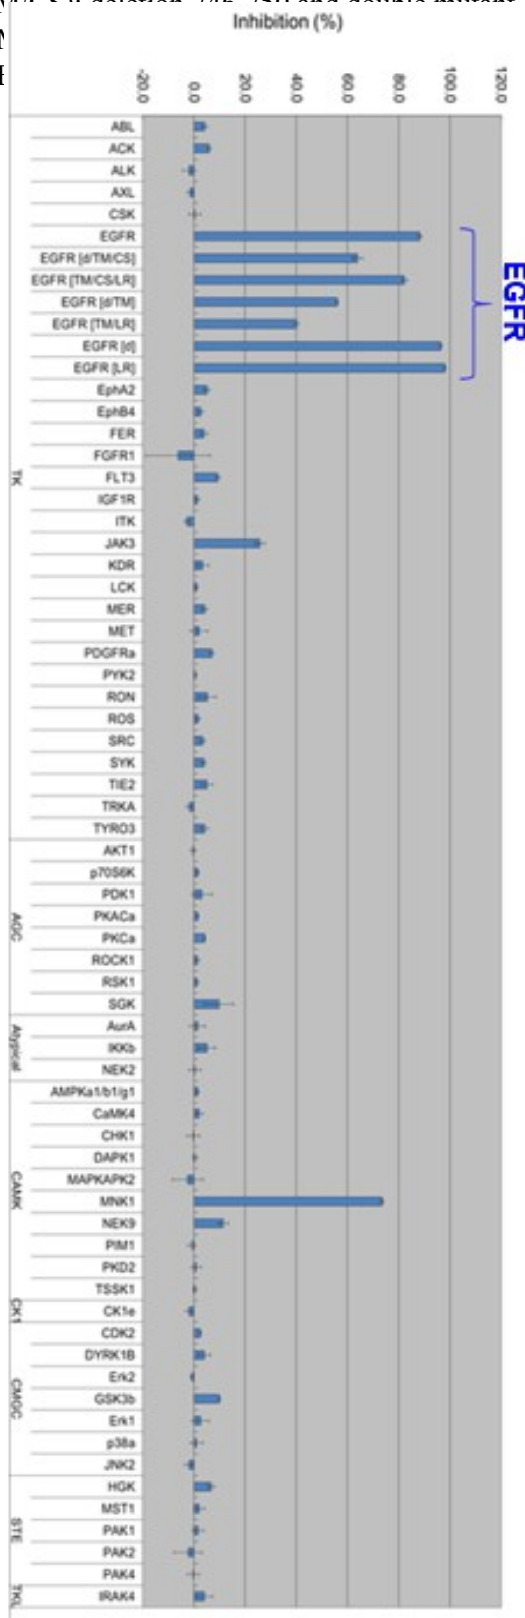

| Comp<br>ound | Data<br>collection        | Space group,<br>Unit cell<br>dimensions | Resolution<br>(Å) <sup>a</sup> | Comple<br>teness<br>(%) <sup>a</sup> | Unique<br>reflections | Redund<br>ancy | Rmerge<br><sup>a, b</sup> | $\langle I/\sigma(I) \rangle$ <sup>a, c</sup> | Protein  |
|--------------|---------------------------|-----------------------------------------|--------------------------------|--------------------------------------|-----------------------|----------------|---------------------------|-----------------------------------------------|----------|
| 1            | Soleil<br>PX2             | 123<br>a=b=c=144.9                      | 2.26 – 45.8<br>(2.26 – 2.32)   | 99.7<br>(96.1)                       | 23885<br>(1714)       | 10.4<br>(10.0) | 0.061<br>(1.56)           | 23.2<br>(1.4)                                 | EGFR_DMX |
| 4            | DLS<br>I04-1              | 123<br>a=b=c=145.5                      | 2.80 – 59.4<br>(2.80 – 2.88)   | 90.6<br>(56.2)                       | 11590<br>(584)        | 10.8<br>(11.9) | 0.124<br>(2.12)           | 15.4<br>(1.3)                                 | EGFR_wt  |
| 4            | D8Venture<br>(Bruker)     | 123<br>a=b=c=145.0                      | 2.30 – 21.9<br>(2.30 – 2.40)   | 99.8<br>(100)                        | 22648<br>(2698)       | 7.1<br>(4.6)   | 0.162<br>(0.820)          | 9.3<br>(1.4)                                  | EGFR_DMX |
| 4            | D8Venture<br>(Bruker)     | 123<br>a=b=c=144.7                      | 2.15 – 21.3<br>(2.15 – 2.25)   | 99.8<br>(100)                        | 27464<br>(3472)       | 9.6<br>(7.7)   | 0.100<br>(0.647)          | 13.2<br>(1.8)                                 | EGFR_TMX |
| 7            | Soleil<br>PX1             | 123<br>a=b=c=144.7                      | 2.06 – 45.8<br>(2.06 – 2.12)   | 99.5<br>(98.3)                       | 30952<br>(2257)       | 13.8<br>(13.3) | 0.055<br>(1.39)           | 22.7<br>(1.7)                                 | EGFR_DMX |
| 8            | D8Venture<br>(Bruker)     | 123<br>a=b=c=143.8                      | 2.00 – 20.8<br>(2.00 – 2.10)   | 98.9<br>(93.2)                       | 33119<br>(4198)       | 13.3<br>(6.5)  | 0.137<br>(0.626)          | 12.9<br>(2.4)                                 | EGFR_TMX |
| 9            | D8Venture<br>(Bruker)     | 123<br>a=b=c=144.9                      | 2.69 – 21.4<br>(2.69 – 2.79)   | 99.6<br>(100)                        | 14176<br>(1464)       | 8.8<br>(8.0)   | 0.139<br>(0.485)          | 12.5<br>(3.4)                                 | EGFR_TMX |
| 10           | D8Venture<br>(Bruker)     | 123<br>a=b=c=144.0                      | 2.20 – 21.2<br>(2.20 – 2.30)   | 99.8<br>(100)                        | 25290<br>(3124)       | 15.0<br>(12.1) | 0.163<br>(0.747)          | 13.0<br>(2.0)                                 | EGFR_TMX |
| 12           | D8Venture<br>(Bruker)     | 123<br>a=b=c=144.4                      | 2.40 – 21.3<br>(2.40 – 2.50)   | 94.6<br>(99.7)                       | 18682<br>(2249)       | 4.1<br>(3.5)   | 0.152<br>(0.684)          | 6.8<br>(1.2)                                  | EGFR_TMX |
| 14           | MicroMax-<br>007 (Rigaku) | 123<br>a=b=c=144.7                      | 2.77 – 14.93<br>(2.77 – 2.92)  | 99.0<br>(99.8)                       | 12847<br>(1879)       | 6.1<br>(6.8)   | 0.229<br>(2.065)          | 7.8<br>(0.6)                                  | EGFR_TMX |

<sup>a</sup> Values in parentheses are for highest resolution shells

<sup>b</sup> Rmerge =  $\sum (I - \langle I \rangle) / \sum I$

<sup>c</sup> Signal to noise ratio of intensities.

Supplementary Tab

Table S1 Data collection

Table S2: Procurement of tested kinases.

| Kinase       | Manufacturer            | Catalog No. |
|--------------|-------------------------|-------------|
| ABL          | Carna Biosciences, Inc. | 08-001      |
| ACK          | Carna Biosciences, Inc. | 08-196      |
| AKT1         | Carna Biosciences, Inc. | 01-101      |
| ALK          | Carna Biosciences, Inc. | 08-518      |
| AMPKa1/b1/g1 | Carna Biosciences, Inc. | 02-113      |
| AurA         | Carna Biosciences, Inc. | 05-101      |
| AXL          | Carna Biosciences, Inc. | 08-107      |
| CaMK4        | Carna Biosciences, Inc. | 02-108      |
| CDK2         | Carna Biosciences, Inc. | 04-103      |
| CHK1         | Carna Biosciences, Inc. | 02-117      |
| CK1e         | Carna Biosciences, Inc. | 03-104      |
| CSK          | Carna Biosciences, Inc. | 08-111      |
| DAPK1        | Carna Biosciences, Inc. | 02-134      |
| DYRK1B       | Carna Biosciences, Inc. | 04-131      |
| EGFR         | Carna Biosciences, Inc. | 08-115      |
| EphA2        | Carna Biosciences, Inc. | 08-121      |
| EphB4        | Carna Biosciences, Inc. | 08-131      |
| Erk1         | Carna Biosciences, Inc. | 04-142      |
| Erk2         | Carna Biosciences, Inc. | 04-143      |
| FER          | Carna Biosciences, Inc. | 08-139      |
| FGFR1        | Carna Biosciences, Inc. | 08-133      |
| FLT3         | Carna Biosciences, Inc. | 08-154      |
| GSK3b        | Carna Biosciences, Inc. | 04-141      |
| HGK          | Carna Biosciences, Inc. | 07-137      |
| IGF1R        | Carna Biosciences, Inc. | 08-141      |
| IKKb         | Carna Biosciences, Inc. | 05-084      |
| IRAK4        | Carna Biosciences, Inc. | 09-145      |
| ITK          | Carna Biosciences, Inc. | 08-181      |
| JAK3         | Carna Biosciences, Inc. | 08-046      |
| JNK2         | Carna Biosciences, Inc. | 04-164      |
| KDR          | Carna Biosciences, Inc. | 08-191      |
| LCK          | Carna Biosciences, Inc. | 08-170      |
| MAPKAPK2     | Carna Biosciences, Inc. | 02-142      |
| MER          | Carna Biosciences, Inc. | 08-108      |
| MET          | Carna Biosciences, Inc. | 08-151      |
| MNK1         | Carna Biosciences, Inc. | 02-145      |
| MST1         | Carna Biosciences, Inc. | 07-116      |
| NEK2         | Carna Biosciences, Inc. | 05-226      |
| NEK9         | Carna Biosciences, Inc. | 05-133      |
| p38a         | Carna Biosciences, Inc. | 04-152      |

|                             |                             |        |
|-----------------------------|-----------------------------|--------|
| p70S6K                      | Carna Biosciences, Inc.     | 01-154 |
| PAK1                        | Carna Biosciences, Inc.     | 07-123 |
| PAK2                        | Carna Biosciences, Inc.     | 07-124 |
| PAK4                        | Carna Biosciences, Inc.     | 07-126 |
| PDGFRa                      | Carna Biosciences, Inc.     | 08-157 |
| PDK1                        | Invitrogen                  | P3001  |
| PIM1                        | Carna Biosciences, Inc.     | 02-054 |
| PKACa                       | Carna Biosciences, Inc.     | 01-127 |
| PKCa                        | Carna Biosciences, Inc.     | 01-133 |
| PKD2                        | Carna Biosciences, Inc.     | 02-158 |
| PYK2                        | Carna Biosciences, Inc.     | 08-138 |
| ROCK1                       | Carna Biosciences, Inc.     | 01-109 |
| RON                         | Carna Biosciences, Inc.     | 08-152 |
| ROS                         | Carna Biosciences, Inc.     | 08-163 |
| RSK1                        | Carna Biosciences, Inc.     | 01-149 |
| SGK                         | Carna Biosciences, Inc.     | 01-158 |
| SRC                         | Carna Biosciences, Inc.     | 08-173 |
| SYK                         | Carna Biosciences, Inc.     | 08-176 |
| TIE2                        | Carna Biosciences, Inc.     | 08-185 |
| TRKA                        | Carna Biosciences, Inc.     | 08-186 |
| TSSK1                       | Carna Biosciences, Inc.     | 02-364 |
| TYRO3                       | Carna Biosciences, Inc.     | 08-109 |
| EGFR [d746-750/T790M/C797S] | Daiichi Sankyo RD<br>Novare | -      |
| EGFR [T790M/C797S/L858R]    | Daiichi Sankyo RD<br>Novare | -      |
| EGFR [d746-750/T790M]       | Carna Biosciences, Inc.     | 08-528 |
| EGFR [T790M/L858R]          | Carna Biosciences, Inc.     | 08-510 |
| EGFR [d746-750]             | Carna Biosciences, Inc.     | 08-527 |
| EGFR [L858R]                | Carna Biosciences, Inc.     | 08-502 |



Table S3: Sequences of Substrate Peptides.

| Peptide Name  | Manufacturer               | Sequence                             | Catalog No.             |
|---------------|----------------------------|--------------------------------------|-------------------------|
| FL-Peptide 1  | PerkinElmer, Inc.          | 5FAM-AKRRRLSSLRA-COOH                | 760345                  |
| FL-Peptide 2  | PerkinElmer, Inc.          | 5FAM-EAIYAAPFAKKK-CONH2              | 760346                  |
| FL-Peptide 4  | PerkinElmer, Inc.          | 5FAM-EGIYGVLFKKK-CONH2               | 760348                  |
| FL-Peptide 6  | PerkinElmer, Inc.          | 5FAM-GRPRTSSFAEG-CONH2               | 760350                  |
| FL-Peptide 7  | PerkinElmer, Inc.          | 5FAM-HMRSAMSGLHLVKRR-COOH            | 760351                  |
| FL-Peptide 8  | PerkinElmer, Inc.          | 5FAM-IPTSPITTTYFFFKKK-COOH           | 760352                  |
| FL-Peptide 10 | PerkinElmer, Inc.          | 5FAM-KKKVSRSGLYRSPSPENLNRP<br>R-COOH | 760354                  |
| FL-Peptide 11 | PerkinElmer, Inc.          | 5FAM-KKLNRTLVA-COOH                  | 760355                  |
| FL-Peptide 12 | PerkinElmer, Inc.          | 5FAM-KKLRRTLVA-COOH                  | 760356                  |
| FL-Peptide 14 | PerkinElmer, Inc.          | 5FAM-KRELVEPLTPSGEAPNQALLR-<br>CONH2 | 760358                  |
| FL-Peptide 15 | PerkinElmer, Inc.          | 5FAM-KRREILSRRPpSYR-COOH             | 760359                  |
| FL-Peptide 16 | PerkinElmer, Inc.          | 5FAM-KRRRALpSVASLPGL-<br>CONH2       | 760360                  |
| FL-Peptide 19 | PerkinElmer, Inc.          | 5FAM-RFARKGSLRQKNV-COOH              | 760363                  |
| FL-Peptide 20 | PerkinElmer, Inc.          | 5FAM-RSRHSSYPAGT-CONH2               | 760364                  |
| FL-Peptide 21 | PerkinElmer, Inc.          | 5FAM-LRRASLG-CONH2                   | 760365                  |
| FL-Peptide 24 | PerkinElmer, Inc.          | 5FAM-KKISGRLSPIMTEQ-<br>CONH2        | 760387                  |
| FL-Peptide 25 | PerkinElmer, Inc.          | 5FAM-VDGKEIYNTIRRK-CONH2             | 760388                  |
| FL-Peptide 26 | PerkinElmer, Inc.          | 5FAM-ARKRERTYSFGHHA-<br>COOH         | 760389                  |
| FL-Peptide 27 | PerkinElmer, Inc.          | 5FAM-EFPIYDFLPAKKK-CONH2             | 760424                  |
| FL-Peptide 29 | PerkinElmer, Inc.          | 5FAM-GGGPATPKKAKKL-<br>CONH2         | 760429                  |
| FL-Peptide 30 | PerkinElmer, Inc.          | 5FAM-KKKKKEIYFFF-CONH2               | 760430                  |
| FL-Peptide 31 | PerkinElmer, Inc.          | 5FAM-RRRLSFAEPG-CONH2                | 760480                  |
| FL-Peptide 32 | PerkinElmer, Inc.          | 5FAM-FLAKSFGSPNRAYKK-<br>CONH2       | 760641                  |
| FL-T308Tide   | Invitrogen                 | FLC-KTFCGTPEYLAPEVRR-<br>COOH        | - (custom<br>synthesis) |
| Srctide       | PEPTIDE<br>INSTITUTE, INC. | FITC-EEPLYWSFPAKKK-CONH2             | - (custom<br>synthesis) |
| IRS1          | PEPTIDE<br>INSTITUTE, INC. | FITC-KKSRGDYMTMQIG-<br>CONH2         | - (custom<br>synthesis) |

Table S4: Assay conditions for tested kinases.

| Kinase       | Kinase concentration (ng/mL) | Substrate Peptide | Additives                                                                   |
|--------------|------------------------------|-------------------|-----------------------------------------------------------------------------|
| ABL          | 75                           | FL-Peptide 2      | 10 mM MgCl <sub>2</sub>                                                     |
| ACK          | 1500                         | FL-Peptide 27     | 10 mM MgCl <sub>2</sub>                                                     |
| AKT1         | 15                           | FL-Peptide 6      | 10 mM MgCl <sub>2</sub>                                                     |
| ALK          | 85                           | IRS1              | 10 mM MgCl <sub>2</sub>                                                     |
| AMPKa1/b1/g1 | 600                          | FL-Peptide 7      | 10 mM MgCl <sub>2</sub>                                                     |
| AurA         | 120                          | FL-Peptide 21     | 10 mM MgCl <sub>2</sub>                                                     |
| AXL          | 120                          | FL-Peptide 30     | 10 mM MgCl <sub>2</sub>                                                     |
| CaMK4        | 2000                         | FL-Peptide 11     | 10 mM MgCl <sub>2</sub> , 0.5 mM CaCl <sub>2</sub> ,<br>10 µg/mL Calmodulin |
| CDK2         | 20                           | FL-Peptide 29     | 10 mM MgCl <sub>2</sub>                                                     |
| CHK1         | 50                           | FL-Peptide 10     | 10 mM MgCl <sub>2</sub>                                                     |
| CK1e         | 890                          | FL-Peptide 16     | 10 mM MgCl <sub>2</sub>                                                     |
| CSK          | 600                          | Srctide           | 10 mM MgCl <sub>2</sub> , 10 mM MnCl <sub>2</sub>                           |
| DAPK1        | 148.9                        | FL-Peptide 1      | 10 mM MgCl <sub>2</sub>                                                     |
| DYRK1B       | 700                          | FL-Peptide 24     | 10 mM MgCl <sub>2</sub>                                                     |
| EGFR         | 800                          | Srctide           | 10 mM MgCl <sub>2</sub> , 10 mM MnCl <sub>2</sub>                           |
| EphA2        | 600                          | FL-Peptide 27     | 10 mM MgCl <sub>2</sub>                                                     |
| EphB4        | 250                          | FL-Peptide 27     | 10 mM MgCl <sub>2</sub>                                                     |
| Erk1         | 150                          | FL-Peptide 8      | 10 mM MgCl <sub>2</sub>                                                     |
| Erk2         | 90                           | FL-Peptide 8      | 10 mM MgCl <sub>2</sub>                                                     |
| FER          | 400                          | Srctide           | 10 mM MgCl <sub>2</sub>                                                     |
| FGFR1        | 300                          | IRS1              | 10 mM MgCl <sub>2</sub>                                                     |
| FLT3         | 100                          | FL-Peptide 2      | 10 mM MgCl <sub>2</sub>                                                     |
| GSK3b        | 50                           | FL-Peptide 15     | 10 mM MgCl <sub>2</sub>                                                     |
| HGK          | 30                           | FL-Peptide 25     | 10 mM MgCl <sub>2</sub>                                                     |
| IGF1R        | 60                           | IRS1              | 10 mM MgCl <sub>2</sub>                                                     |
| IKKb         | 5010                         | FL-Peptide 1      | 10 mM MgCl <sub>2</sub>                                                     |
| IRAK4        | 750                          | FL-Peptide 8      | 10 mM MnCl <sub>2</sub>                                                     |
| ITK          | 350                          | FL-Peptide 27     | 10 mM MgCl <sub>2</sub>                                                     |
| JAK3         | 50                           | Srctide           | 10 mM MgCl <sub>2</sub>                                                     |
| JNK2         | 1295                         | FL-Peptide 14     | 10 mM MgCl <sub>2</sub>                                                     |
| KDR          | 30                           | Srctide           | 10 mM MgCl <sub>2</sub> , 0.05%<br>CHAPSO, 0.01% BSA                        |
| LCK          | 50                           | FL-Peptide 4      | 10 mM MgCl <sub>2</sub>                                                     |
| MAPKAPK2     | 30                           | FL-Peptide 12     | 10 mM MgCl <sub>2</sub>                                                     |
| MER          | 30                           | FL-Peptide 27     | 10 mM MgCl <sub>2</sub>                                                     |
| MET          | 90                           | FL-Peptide 30     | 10 mM MgCl <sub>2</sub>                                                     |
| MNK1         | 440                          | FL-Peptide 10     | 10 mM MgCl <sub>2</sub>                                                     |
| MST1         | 30                           | FL-Peptide 25     | 10 mM MgCl <sub>2</sub>                                                     |
| NEK2         | 500                          | FL-Peptide 32     | 10 mM MgCl <sub>2</sub>                                                     |

|                             |      |               |                                                                     |
|-----------------------------|------|---------------|---------------------------------------------------------------------|
| NEK9                        | 756  | FL-Peptide 32 | 10 mM MgCl <sub>2</sub>                                             |
| p38a                        | 225  | FL-Peptide 8  | 10 mM MgCl <sub>2</sub>                                             |
| p70S6K                      | 30   | FL-Peptide 26 | 10 mM MgCl <sub>2</sub>                                             |
| PAK1                        | 313  | FL-Peptide 1  | 10 mM MgCl <sub>2</sub>                                             |
| PAK2                        | 285  | FL-Peptide 1  | 10 mM MgCl <sub>2</sub>                                             |
| PAK4                        | 700  | FL-Peptide 31 | 10 mM MgCl <sub>2</sub>                                             |
| PDGFRa                      | 600  | FL-Peptide 30 | 10 mM MgCl <sub>2</sub>                                             |
| PDK1                        | 600  | FL-T308Tide   | 10 mM MgCl <sub>2</sub> , 2 μM PIFtide                              |
| PIM1                        | 20   | FL-Peptide 20 | 10 mM MgCl <sub>2</sub>                                             |
| PKACa                       | 7    | FL-Peptide 21 | 10 mM MgCl <sub>2</sub>                                             |
| PKCa                        | 6    | FL-Peptide 19 | 10 mM MgCl <sub>2</sub> , 0.1 mM CaCl <sub>2</sub> ,<br>10 μg/mL PS |
| PKD2                        | 20   | FL-Peptide 12 | 10 mM MgCl <sub>2</sub>                                             |
| PYK2                        | 200  | FL-Peptide 27 | 10 mM MgCl <sub>2</sub>                                             |
| ROCK1                       | 225  | FL-Peptide 1  | 10 mM MgCl <sub>2</sub>                                             |
| RON                         | 280  | Srctide       | 10 mM MgCl <sub>2</sub>                                             |
| ROS                         | 20   | Srctide       | 10 mM MgCl <sub>2</sub>                                             |
| RSK1                        | 1390 | FL-Peptide 11 | 10 mM MgCl <sub>2</sub>                                             |
| SGK                         | 15   | FL-Peptide 6  | 10 mM MgCl <sub>2</sub>                                             |
| SRC                         | 74.8 | FL-Peptide 4  | 10 mM MgCl <sub>2</sub>                                             |
| SYK                         | 600  | Srctide       | 10 mM MgCl <sub>2</sub>                                             |
| TIE2                        | 150  | FL-Peptide 27 | 10 mM MgCl <sub>2</sub>                                             |
| TRKA                        | 150  | FL-Peptide 27 | 10 mM MgCl <sub>2</sub>                                             |
| TSSK1                       | 500  | FL-Peptide 10 | 10 mM MgCl <sub>2</sub>                                             |
| TYRO3                       | 84   | FL-Peptide 27 | 10 mM MgCl <sub>2</sub>                                             |
| EGFR [d746-750/T790M/C797S] | 350  | Srctide       | 5 mM MgCl <sub>2</sub> , 1 mM MnCl <sub>2</sub>                     |
| EGFR [T790M/C797S/L858R]    | 200  | Srctide       | 5 mM MgCl <sub>2</sub> , 1 mM MnCl <sub>2</sub>                     |
| EGFR [d746-750/T790M]       | 180  | Srctide       | 5 mM MgCl <sub>2</sub> , 1 mM MnCl <sub>2</sub>                     |
| EGFR [T790M/L858R]          | 500  | Srctide       | 5 mM MgCl <sub>2</sub> , 1 mM MnCl <sub>2</sub>                     |
| EGFR [d746-750]             | 120  | Srctide       | 5 mM MgCl <sub>2</sub> , 1 mM MnCl <sub>2</sub>                     |
| EGFR [L858R]                | 160  | Srctide       | 5 mM MgCl <sub>2</sub> , 1 mM MnCl <sub>2</sub>                     |

Table S5 Mass spectrometry of EGFR\_TMXX and EGFR\_DMXX incubated with acrylamide fragments at pH 7.4

| Compound  | % product <sup>1</sup><br>EGFR_TMXX | Added<br>mass | % di-<br>addition | % product <sup>1</sup><br>EGFR_DMXX | % di-<br>addition |
|-----------|-------------------------------------|---------------|-------------------|-------------------------------------|-------------------|
| <b>2</b>  | 0                                   |               |                   | 0                                   |                   |
| <b>3</b>  | 5                                   |               |                   | 100                                 |                   |
| <b>4</b>  | 55                                  | 148           | 25                | 100                                 | no                |
| <b>5</b>  | 0                                   |               |                   | 100                                 |                   |
| <b>6</b>  | 0                                   |               |                   | 100                                 |                   |
| <b>7</b>  | 0                                   |               |                   | 100                                 |                   |
| <b>8</b>  | 45                                  | 198           | 15                | 100                                 | 0                 |
| <b>9</b>  | 0                                   |               |                   | ND                                  |                   |
| <b>10</b> | 25                                  | 187           | 15                | 100                                 | 0                 |
| <b>11</b> | 0                                   |               |                   | 25                                  |                   |

<sup>1</sup> percentage of the sample which had a mass greater than that of the original protein sample alone

| PDB Code | Resolution (Å) <sup>2</sup>  | No. of reflections used in refinement <sup>2</sup> | Completeness (%) <sup>2</sup> | R <sub>work</sub> <sup>3, d</sup> | R <sub>free</sub> <sup>3, d, e</sup> | Average B-factor (Å <sup>2</sup> ) All atoms / Ligand | Rms deviations from ideal Bonds (Å) / Angles (°) | Ramachandran plot Most favoured / Allowed / Outliers (%) <sup>9</sup> | Protein   |
|----------|------------------------------|----------------------------------------------------|-------------------------------|-----------------------------------|--------------------------------------|-------------------------------------------------------|--------------------------------------------------|-----------------------------------------------------------------------|-----------|
| 8HV1     | 2.40 – 25.0<br>(2.40 – 2.53) | 18909<br>(2842)                                    | 99.9<br>(100)                 | 0.189<br>(0.358)                  | 0.219<br>(0.365)                     | 61.5 / 83.6                                           | 0.010 / 1.58                                     | 95.7 / 4.3 / 0.0                                                      | EGFR_DMXX |
| 8HV2     | 2.80 – 25.0<br>(2.80 – 2.95) | 11019<br>(1326)                                    | 90.6<br>(73.6)                | 0.177<br>(0.314)                  | 0.216<br>(0.387)                     | 80.3 / 68.9                                           | 0.007 / 1.48                                     | 95.2 / 4.8 / 0.0                                                      | EGFR_wt   |
| 8HV3     | 2.40 – 20.0<br>(2.40 – 2.53) | 18888<br>(2841)                                    | 99.4<br>(100)                 | 0.212<br>(0.292)                  | 0.250<br>(0.305)                     | 44.5 / 60.9                                           | 0.010 / 1.66                                     | 96.3 / 3.4 / 0.3                                                      | EGFR_DMXX |
| 8HV4     | 2.20 – 20.0<br>(2.20 – 2.32) | 24015<br>(3637)                                    | 98.4<br>(99.2)                | 0.237<br>(0.352)                  | 0.275<br>(0.401)                     | 42.5 / 43.7                                           | 0.011 / 1.67                                     | 96.3 / 3.7 / 0.0                                                      | EGFR_TMXX |
| 8HV5     | 2.20 – 20.0<br>(2.20 – 2.32) | 24229<br>(3634)                                    | 99.4<br>(100)                 | 0.186<br>(0.244)                  | 0.224<br>(0.303)                     | 57.3 / 80.5                                           | 0.011 / 1.57                                     | 98.0 / 2.0 / 0.0                                                      | EGFR_DMXX |
| 8HV6     | 2.20 – 20.0<br>(2.20 – 2.32) | 23956<br>(3590)                                    | 99.6<br>(99.8)                | 0.247<br>(0.366)                  | 0.296<br>(0.400)                     | 36.4 / 54.4                                           | 0.011 / 1.73                                     | 97.0 / 3.0 / 0.0                                                      | EGFR_TMXX |
| 8HV7     | 2.69 – 21.4<br>(2.69 – 2.76) | 13193<br>(1019)                                    | 97.6<br>(99.8)                | 0.218<br>(0.284)                  | 0.290<br>(0.317)                     | 41.0 / 46.6                                           | 0.009 / 1.53                                     | 96.2 / 3.8 / 0.0                                                      | EGFR_TMXX |
| 8HV8     | 2.40 – 20.0<br>(2.40 – 2.53) | 18367<br>(2771)                                    | 99.1<br>(99.8)                | 0.232<br>(0.313)                  | 0.283<br>(0.383)                     | 40.4 / 62.5                                           | 0.010 / 1.66                                     | 97.3 / 2.7 / 0.0                                                      | EGFR_TMXX |
| 8HV9     | 2.50 – 20.0<br>(2.50 – 2.63) | 15629<br>(2472)                                    | 94.0<br>(100)                 | 0.253<br>(0.328)                  | 0.274<br>(0.290)                     | 40.1 / 60.2                                           | 0.009 / 1.60                                     | 96.0 / 3.7 / 0.3                                                      | EGFR_TMXX |
| 8HVA     | 2.77 – 14.9<br>(2.77 – 2.92) | 12206<br>(1845)                                    | 98.5<br>(99.7)                | 0.242<br>(0.681)                  | 0.251<br>(0.720)                     | 69.8 / 70.8                                           | 0.007 / 1.52                                     | 94.5 / 5.1 / 0.3                                                      | EGFR_TMXX |

Values in parentheses are for highest resolution shells

$\frac{\sum(F_{obs} - F_{calc})}{\sum F_{obs}}$   
percent of reflections were randomly chosen for calculation of R<sub>free</sub>.  
mean square deviations from ideal geometry<sup>13</sup>  
defined in Procheck<sup>14</sup>

Table S6: Summary of refinement statistics

## References

1. DiscoverX. KINOMEscan Assay Process. **2021**, Vol. 2022.
2. Nicolas Baurin, Fareed Aboul-Ela, Xavier Barril, Ben Davis, Martin Drysdale, Brian Dymock, Harry Finch, Christophe Fromont, Christine Richardson, Heather Simmonite, Roderick E. Hubbard. Design and characterization of libraries of molecular fragments for use in NMR screening against protein targets. *J Chem Inf Comput Sci* **2004**, *44*, 2157-66.
3. I-Jen Chen, Roderick E. Hubbard. Lessons for fragment library design: analysis of output from multiple screening campaigns. *J Comput Aided Mol Des* **2009**, *23*, 603-20.
4. G. Madhavi Sastry, Matvey Adzhigirey, Tyler Day, Ramakrishna Annabhimoju, Woody Sherman. Protein and ligand preparation: parameters, protocols, and influence on virtual screening enrichments. *J Comput Aided Mol Des* **2013**, *27*, 221-34.
5. Kai Zhu, Kenneth W. Borrelli, Jeremy R. Greenwood, Tyler Day, Robert Abel, Ramy S. Farid, Edward Harder. Docking covalent inhibitors: a parameter free approach to pose prediction and scoring. *J Chem Inf Model* **2014**, *54*, 1932-40.
6. Dora Toledo Warshaviak, Gali Golan, Kenneth W. Borrelli, Kai Zhu, Ori Kalid. Structure-based virtual screening approach for discovery of covalently bound ligands. *J Chem Inf Model* **2014**, *54*, 1941-50.
7. Wolfgang Kabsch. Xds. *Acta Crystallogr D Biol Crystallogr* **2010**, *66*, 125-32.
8. Martyn D. Winn, Charles C. Ballard, Kevin D. Cowtan, Eleanor J. Dodson, Paul Emsley, Phil R. Evans, Ronan M. Keegan, Eugene B. Krissinel, Andrew G. W. Leslie, Airlie McCoy, Stuart J. McNicholas, Garib N. Murshudov, Navraj S. Pannu, Elizabeth A. Potterton, Harold R. Powell, Randy J. Read, Alexei Vagin, Keith S. Wilson. Overview of the CCP4 suite and current developments. *Acta Crystallographica Section D: Biological Crystallography* **2011**, *67*, 235-242.
9. Alexei Vagin, Alexei Teplyakov. Molecular replacement with MOLREP. *Acta Crystallogr D Biol Crystallogr* **2010**, *66*, 22-5.
10. G. N. Murshudov, A. A. Vagin, E. J. Dodson. Refinement of macromolecular structures by the maximum-likelihood method. *Acta Crystallogr D Biol Crystallogr* **1997**, *53*, 240-55.
11. Emsley, P. & Cowtan, K. Coot: model-building tools for molecular graphics. *Acta Crystallogr D Biol Crystallogr* **60**, 2126-32 (2004).
12. Fei Long, Robert A. Nicholls, Paul Emsley, Saulius Gražulis, Andrius Merkys, Antanas Vaitkus and Garib N. Murshudov. AceDRG: a stereochemical description generator for ligands. *Acta crystallographica. Section D, Structural biology* **2017**, *73*, 112-122.
13. R. A. Engh, R. Huber. Accurate bond and angle parameters for X-ray protein structure refinement. *Acta Crystallographica Section A* **1991**, *47*, 392-400.
14. R. A. Laskowski, M. W. MacArthur, D. S. Moss, J. M. Thornton. PROCHECK: a program to check the stereochemical quality of protein structures. *Journal of Applied Crystallography* **1993**, *26*, 283-291.
